# Supplementary material for: Inferring the anthropogenic NO x emission trend over the United States during 2003–2017 from satellite observations: Was there a flattening of the emission tend after the Great Recession?
Source: Copernicus journal article supplement (doi:10.5194/acp-2019-472), 2019-07-16
Supplement: Supplementary file 2 [file acp-2019-472-supplement.zip]

**Inferring the anthropogenic NO<sub>x</sub> emission trend over the United States during 2003 - 2017 from satellite observations: Was there a flattening of the emission trend after the Great Recession?**

Jianfeng Li<sup>1</sup>, Yuhang Wang<sup>1\*</sup>

<sup>1</sup>School of Earth and Atmospheric Sciences, Georgia Institute of Technology, Atlanta, Georgia, USA

\* *Correspondence to* Yuhang Wang (yuhang.wang@eas.gatech.edu)

## 12 **Table Captions**

13 Table S1. Summary of major satellite instruments for remote sensing of atmospheric NO<sub>2</sub> VCD in  
14 the past decade

15 Table S2. Summary of satellite NO<sub>2</sub> TVCD products and their retrieval information

16 Table S3. Selection criteria for satellite NO<sub>2</sub> TVCD pixel data

17 Table S4. Summary of annual trends of AQS NO<sub>2</sub> surface concentrations and satellite NO<sub>2</sub> TVCD  
18 products in each region during different periods

19 **Table S1. Summary of major satellite instruments for remote sensing of atmospheric NO<sub>2</sub> VCD in the past decade**

| Instrument | Satellite              | Launch date             | End date                | Operator              | Equator crossing time (local time) | UV/Vis Spectral range (nm) | Spectral resolution (nm) | Swath length (km)                                                                             | Nadir pixel resolution (km × km)                                                                     | Global coverage (days) |
|------------|------------------------|-------------------------|-------------------------|-----------------------|------------------------------------|----------------------------|--------------------------|-----------------------------------------------------------------------------------------------|------------------------------------------------------------------------------------------------------|------------------------|
| SCIAMACHY  | ENVISAT <sup>1</sup>   | 03/01/2002 <sup>2</sup> | 04/08/2012 <sup>2</sup> | ESA <sup>3</sup>      | 10:00 <sup>1</sup>                 | 240 – 805 <sup>4</sup>     | 0.24 – 0.48 <sup>4</sup> | 960 <sup>5</sup>                                                                              | 60 × 30 <sup>5</sup>                                                                                 | 6 <sup>5</sup>         |
| GOME-2A    | MetOp-A <sup>6</sup>   | 10/19/2006 <sup>6</sup> | in operation            | EUMETSAT <sup>7</sup> | 9:30 <sup>8</sup>                  | 240 – 790 <sup>8</sup>     | 0.26 – 0.51 <sup>8</sup> | 1920 before Jul. 15 <sup>th</sup> , 2013; 960 after Jul. 15 <sup>th</sup> , 2013 <sup>8</sup> | 80 × 40 before Jul. 15 <sup>th</sup> , 2013; 40 × 40 after Jul. 15 <sup>th</sup> , 2013 <sup>8</sup> | 1.5 <sup>9</sup>       |
| GOME-2B    | MetOp-B <sup>6</sup>   | 09/17/2012 <sup>6</sup> | In operation            | EUMETSAT              | 9:30 <sup>8</sup>                  | 240 – 790 <sup>8</sup>     | 0.26 – 0.51 <sup>8</sup> | 1920 <sup>8</sup>                                                                             | 80 × 40 <sup>8</sup>                                                                                 | 1.5 <sup>9</sup>       |
| OMI        | EOS-Aura <sup>10</sup> | 07/152004 <sup>10</sup> | In operation            | NASA                  | 13:45 <sup>10</sup>                | 270 – 500 <sup>11</sup>    | 0.45 – 1.0 <sup>11</sup> | 2600 <sup>11</sup>                                                                            | 24 × 13 <sup>11</sup>                                                                                | 1 <sup>11</sup>        |

20 <sup>1</sup> Refer to <https://earth.esa.int/web/guest/missions/esa-operational-eo-missions/envisat>  
21 <sup>2</sup> Refer to <https://en.wikipedia.org/wiki/Envisat>  
22 <sup>3</sup> The European Space Agency  
23 <sup>4</sup> Refer to <http://www.iup.uni-bremen.de/sciamachy/instrument/performance/index.html>  
24 <sup>5</sup> Refer to Boersma et al. (2008), Boersma et al. (2009), and (Lee et al., 2009)  
25 <sup>6</sup> Refer to <https://www.eumetsat.int/website/home/Satellites/CurrentSatellites/Metop/index.html>  
26 <sup>7</sup> The European Organization for the Exploitation of Meteorological Satellites  
27 <sup>8</sup> Refer to EUMETSAT (2015)  
28 <sup>9</sup> Refer to Lee et al. (2009) and Wang et al. (2017)  
29 <sup>10</sup> Refer to <https://aura.gsfc.nasa.gov/>  
30 <sup>11</sup> Refer to <https://aura.gsfc.nasa.gov/omi.html>

31 **Table S2. Summary of satellite NO<sub>2</sub> TVCD products and their retrieval information**

| NO <sub>2</sub> TVCD products | Version       | Available period        | DOAS fitting method                                                                     | Stratosphere–troposphere separation                                                                                                                                                | Fitting window (nm)        | Albedo / reflectance                                                           | A priori profiles              | Radiative transfer model | Cloud                                                         | Uncertainty                                                                                                                                                                                                      |
|-------------------------------|---------------|-------------------------|-----------------------------------------------------------------------------------------|------------------------------------------------------------------------------------------------------------------------------------------------------------------------------------|----------------------------|--------------------------------------------------------------------------------|--------------------------------|--------------------------|---------------------------------------------------------------|------------------------------------------------------------------------------------------------------------------------------------------------------------------------------------------------------------------|
| GOME-2B                       | TM4NO2A (2.3) | 12/20/2012 – current    | Intensity fit <sup>1</sup>                                                              | Assimilation of satellite total slant columns in the TM4 model <sup>2, 3</sup>                                                                                                     | 405 – 465 <sup>1</sup>     | Climatology albedo from 3 years of OMI data <sup>4</sup>                       | TM4 (2° × 3°) <sup>2</sup>     | DAK <sup>2</sup>         | FRESCO+ (Oxygen A-band around 760 nm) <sup>5</sup>            | 1.0 × 10 <sup>15</sup> molecules/cm <sup>2</sup> + 25% <sup>2</sup>                                                                                                                                              |
| SCIAMACHY                     | QA4ECV (v1.1) | 08/02/2002 – 04/08/2012 | Optical Density <sup>1, 6</sup>                                                         | Assimilation of OMI total slant columns in the TM5 - MP model <sup>6, 7</sup>                                                                                                      | 425 – 465 <sup>6</sup>     | Climatology albedo based on SCIAMACHY <sup>8</sup>                             | TM5-MP (1° × 1°) <sup>6</sup>  | DAK                      | FRESCO+                                                       | 35% - 45% over polluted scenes; > 100% over background regions (Pacific Ocean) <sup>6</sup>                                                                                                                      |
| GOME-2A                       | QA4ECV (v1.1) | 02/01/2007 – 12/31/2016 |                                                                                         |                                                                                                                                                                                    | 405 – 465 <sup>1, 6</sup>  | Climatology albedo based on GOME-2A <sup>8</sup>                               |                                |                          | FRESCO+                                                       |                                                                                                                                                                                                                  |
| OMI-QA4ECV                    | QA4ECV (v1.1) | 10/012004 – Current     |                                                                                         |                                                                                                                                                                                    | 405 – 465 <sup>1, 6</sup>  | Climatology albedo from 5 years of OMI data <sup>6</sup>                       |                                |                          | Improved O <sub>2</sub> -O <sub>2</sub> (477 nm) <sup>9</sup> |                                                                                                                                                                                                                  |
| OMI-NASA                      | SPv3          | 01/01/2005 – 07/31/2017 |                                                                                         |                                                                                                                                                                                    | 402 – 465 <sup>1, 10</sup> | OMI climatology albedo <sup>10</sup>                                           | GMI (1° × 1.25°) <sup>10</sup> | TMORAD <sup>10</sup>     | O <sub>2</sub> -O <sub>2</sub> (477 nm) <sup>10, 11</sup>     | SPv2.1 TVCD has uncertainties of about 30% under clear-sky conditions to about 60% under cloudy conditions <sup>12</sup> , and the relative difference between SPv3 and SPv2.1 is less than ~20% <sup>10</sup> . |
| OMI-BEHR <sup>13</sup>        | v3.0B         | 01/01/2005 – 07/31/2017 | Stepwise intensity fit with monthly averaged solar irradiance spectrum <sup>1, 10</sup> | Based on OMI total slant columns over regions with low estimated TVCD contributions (TVCD contributions less than 0.3 × 10 <sup>15</sup> molecules/cm <sup>2</sup> ) <sup>10</sup> |                            | Based on MCD43D BRDF product (for land) and model parameterization (for ocean) | WRF-Chem (12 km)               |                          |                                                               |                                                                                                                                                                                                                  |

32 <sup>1</sup> Refer to Zara et al. (2018)

33 <sup>2</sup> Refer to Boersma et al. (2011). “TM4” is the Tracer Model, version 4. “DAK” is the Doubling-Adding KNMI (DAK) radiative transfer model.

34 <sup>3</sup> Refer to Williams et al. (2009)

35 <sup>4</sup> Refer to Kleipool et al. (2008)

36 <sup>5</sup> Refer to Wang et al. (2017) and Wang et al. (2008)

37 <sup>6</sup> Refer to Boersma et al. (2018)

38 <sup>7</sup> Refer to Williams et al. (2017)

39 <sup>8</sup> Refer to Tilstra et al. (2017)

40 <sup>9</sup> Refer to Veeffkind et al. (2016)

41 <sup>10</sup> Refer to Bucsela et al. (2013), Bucsela et al. (2016), Krotkov et al. (2017), and Marchenko et al. (2015). “TMORAD” is the TMOS radiative transfer model.

42 <sup>11</sup> Refer to Acarreta et al. (2004)

43 <sup>12</sup> Refer to Lamsal et al. (2014), Oetjen et al. (2013), and Tong et al. (2015)

44 <sup>13</sup> Refer to Laughner et al. (2018). OMI-BEHR uses the SCD from OMI-NASA SPv3 but updates inputs for the AMF calculation, such as a prior NO<sub>2</sub> vertical profiles and surface reflectance. Besides, OMI-BEHR only provides NO<sub>2</sub> TVCD over the contiguous

45 United States (CONUS). As in this study, we used the OMI-NASA datasets archived in the OMI-BEHR product, so we only obtained OMI-NASA datasets extended to July 31, 2017.

46 <sup>14</sup> Average uncertainty over the CONUS is calculated based on the file from <http://behr.cchem.berkeley.edu/behr/BEHR-us-uncertainty.hdf>

47 **Table S3. Selection criteria for satellite NO<sub>2</sub> TVCD pixel data**

| NO <sub>2</sub> TVCD products | Period                  | Solar zenith angle | albedo | Cloud radiance fraction | Snow or ice covered | AMFtrop/AMFgeo | Flag for retrieval success | Retrieval quality flag | Rows in swath |
|-------------------------------|-------------------------|--------------------|--------|-------------------------|---------------------|----------------|----------------------------|------------------------|---------------|
| GOME-2B                       | 01/01/2013 – 12/31/2017 | < 80°              | <= 0.3 | <= 50%                  | No                  | > 0.2          | Yes                        |                        | All           |
| SCIAMACHY                     | 01/01/2003 – 12/31/2011 | < 80°              | <= 0.3 | <= 50%                  | No                  | > 0.2          | Yes                        |                        | All           |
| GOME-2A                       | 01/01/2008 – 12/31/2016 | < 80°              | <= 0.3 | <= 50%                  | No                  | > 0.2          | Yes                        |                        | All           |
| OMI-QA4ECV <sup>1</sup>       | 01/01/2005 – 12/31/2017 | < 80°              | <= 0.3 | <= 50%                  | No                  | > 0.2          | Yes                        |                        | 6 - 21        |
| OMI-NASA <sup>1</sup>         | 01/01/2005 – 12/31/2016 | < 80°              | <= 0.3 | <= 50%                  |                     |                | Yes                        | Yes                    | 6 – 21        |
| OMI-BEHR <sup>1</sup>         | 01/01/2005 – 12/31/2016 | < 80°              | <= 0.3 | <= 50%                  |                     |                | Yes                        | Yes                    | 6 - 21        |

48 <sup>1</sup> Rows 6-21 are selected to remove the anomalies developed in the OMI sensor (Boersma et al., 2018; Zhang et al., 2018).

49

Table S4. Summary of annual trends of AQS NO<sub>2</sub> surface concentrations and satellite NO<sub>2</sub> TVCD products in each region during different periods<sup>1</sup>

|                                             |             | Northeast     |              | Midwest       |              | South        |             | West          |              |
|---------------------------------------------|-------------|---------------|--------------|---------------|--------------|--------------|-------------|---------------|--------------|
|                                             |             | AQS site      | CONUS        | AQS site      | CONUS        | AQS site     | CONUS       | AQS site      | CONUS        |
| AQS NO <sub>2</sub> VMR<br>at 13:00 -14:00  | 2003 – 2011 | -6.8 ± 0.7%   |              | -6.1 ± 1.2%   |              | -6.6 ± 0.7%  |             | -7.6 ± 1.2%   |              |
|                                             | 2011 – 2017 | -8.0 ± 1.2%   |              | -6.4 ± 0.8%   |              | -5.8 ± 0.6%  |             | -7.2 ± 1.6%   |              |
| AQS NO <sub>2</sub> VMR<br>at 10:00 – 11:00 | 2003 – 2011 | -6.6 ± 0.5%   |              | -5.8 ± 1.5%   |              | -6.5 ± 1.3%  |             | -7.1 ± 1.6%   |              |
|                                             | 2011 – 2017 | -7.6 ± 1.0%   |              | -6.8 ± 0.5%   |              | -5.7 ± 0.1%  |             | -6.1 ± 1.1%   |              |
| SCIAMACHY                                   | 2003 – 2011 | -17.1 ± 2.7%  | -11.0 ± 3.3% | -12.9 ± 6.8%  | -6.5 ± 0.8%  | -9.1 ± 1.0%  | -6.2 ± 1.5% | -9.1 ± 1.8%   | -7.0 ± 1.4%  |
|                                             | 2011 – 2017 |               |              |               |              |              |             |               |              |
| GOME2B                                      | 2003 – 2011 |               |              |               |              |              |             |               |              |
|                                             | 2013 – 2017 | -11.4 ± 3.7%  | -10.8 ± 3.9% | -9.9 ± 13.1%  | -4.4 ± 27.2% | -8.9 ± 3.0%  | -7.5 ± 3.6% | -11.8 ± 3.0%  | -10.6 ± 2.3% |
| OMI-QA4ECV                                  | 2005 – 2011 | -14.2 ± 6.3%  | -10.6 ± 3.8% | -9.2 ± 4.2%   | -8.4 ± 2.8%  | -9.2 ± 2.7%  | -8.2 ± 1.5% | -10.5 ± 1.6%  | -8.7 ± 0.9%  |
|                                             | 2011 – 2017 | -18.0 ± 16.2% | -7.6 ± 4.2%  | -7.6 ± 3.3%   | -7.0 ± 1.7%  | -4.8 ± 1.4%  | -4.6 ± 1.0% | -6.4 ± 1.4%   | -4.8 ± 1.2%  |
| OMI-NASA                                    | 2005 – 2011 | -11.8 ± 1.3%  | -11.0 ± 1.8% | -10.9 ± 4.8%  | -10.0 ± 4.1% | -10.0 ± 3.5% | -9.5 ± 1.9% | -10.2 ± 1.8%  | -8.5 ± 0.9%  |
|                                             | 2011 – 2016 | -10.0 ± 4.9%  | -8.5 ± 3.8%  | -13.2 ± 3.2%  | -9.2 ± 2.7%  | 0.3 ± 19.2%  | -8.0 ± 5.5% | -9.0 ± 5.7%   | -6.6 ± 3.9%  |
| OMI-BEHR                                    | 2005 – 2011 | -11.8 ± 1.8%  | -10.9 ± 1.9% | -12.2 ± 7.3%  | -9.8 ± 4.4%  | -9.5 ± 3.1%  | -8.8 ± 2.0% | -9.9 ± 1.1%   | -8.2 ± 0.4%  |
|                                             | 2011 – 2016 | -8.2 ± 3.4%   | -6.6 ± 1.7%  | -27.4 ± 24.3% | -8.1 ± 3.0%  | -7.2 ± 2.3%  | -5.0 ± 1.3% | -13.2 ± 14.5% | -7.0 ± 4.8%  |

50

<sup>1</sup> Annual trends are the averages of regional seasonal trends (e.g, Figure 7).

## 52    **References**

- 53    Acarreta, J. R., de Haan, J. F., and Stammes, P.: Cloud pressure retrieval using the O<sub>2</sub> - O<sub>2</sub>  
54    absorption band at 477 nm, *Journal of Geophysical Research: Atmospheres*, 109,  
55    10.1029/2003JD003915, 2004.
- 56    Boersma, K. F., Jacob, D. J., Eskes, H. J., Pinder, R. W., Wang, J., and Van Der A, R. J.:  
57    Intercomparison of SCIAMACHY and OMI tropospheric NO<sub>2</sub> columns: Observing the diurnal  
58    evolution of chemistry and emissions from space, *Journal of Geophysical Research:*  
59    *Atmospheres*, 113, 10.1029/2007JD008816, 2008.
- 60    Boersma, K. F., Jacob, D. J., Trainic, M., Rudich, Y., De Smedt, I., Dirksen, R., and Eskes, H. J.:  
61    Validation of urban NO<sub>2</sub> concentrations and their diurnal and seasonal variations observed from  
62    the SCIAMACHY and OMI sensors using in situ surface measurements in Israeli cities,  
63    *Atmospheric Chemistry and Physics*, 9, 3867-3879, 10.5194/acp-9-3867-2009, 2009.
- 64    Boersma, K. F., Eskes, H. J., Dirksen, R. J., Veefkind, J. P., Stammes, P., Huijnen, V., Kleipool,  
65    Q. L., Sneep, M., Claas, J., and Leitão, J.: An improved tropospheric NO<sub>2</sub> column retrieval  
66    algorithm for the Ozone Monitoring Instrument, *Atmospheric Measurement Techniques*, 4, 1905-  
67    1928, 10.5194/amt-4-1905-2011, 2011.
- 68    Boersma, K. F., Eskes, H. J., Richter, A., De Smedt, I., Lorente, A., Beirle, S., van Geffen, J. H.,  
69    Zara, M., Peters, E., and Roozendael, M. V.: Improving algorithms and uncertainty estimates for  
70    satellite NO<sub>2</sub> retrievals: results from the quality assurance for the essential climate variables  
71    (QA4ECV) project, *Atmospheric Measurement Techniques*, 11, 6651-6678, 10.5194/amt-11-  
72    6651-2018, 2018.
- 73    Bucsela, E. J., Krotkov, N. A., Celarier, E. A., Lamsal, L. N., Swartz, W. H., Bhartia, P. K.,  
74    Boersma, K. F., Veefkind, J. P., Gleason, J. F., and Pickering, K. E.: A new stratospheric and  
75    tropospheric NO<sub>2</sub> retrieval algorithm for nadir-viewing satellite instruments: applications to OMI,  
76    *Atmospheric Measurement Techniques*, 6, 2607-2626, 10.5194/amt-6-2607-2013, 2013.
- 77    Bucsela, E. J., Celarier, E. A., Gleason, J. L., Krotkov, N. A., Lamsal, L. N., Marchenko, S. V.,  
78    and Swartz, W. H.: OMNO2 README Document Data Product Version 3.0, NASA, 38, 2016.
- 79    EUMETSAT: GOME\_FACTSHEET, Germany, 33, 2015.
- 80    Kleipool, Q. L., Dobber, M. R., de Haan, J. F., and Levelt, P. F.: Earth surface reflectance  
81    climatology from 3 years of OMI data, *Journal of Geophysical Research: Atmospheres*, 113,  
82    10.1029/2008JD010290, 2008.
- 83    Krotkov, N. A., Lamsal, L. N., Celarier, E. A., Swartz, W. H., Marchenko, S. V., Bucsela, E. J.,  
84    Chan, K. L., Wenig, M., and Zara, M.: The version 3 OMI NO<sub>2</sub> standard product, *Atmospheric*  
85    *Measurement Techniques*, 10, 3133-3149, 10.5194/amt-10-3133-2017, 2017.
- 86    Lamsal, L. N., Krotkov, N. A., Celarier, E. A., Swartz, W. H., Pickering, K. E., Bucsela, E. J.,  
87    Gleason, J. F., Martin, R. V., Philip, S., and Irie, H.: Evaluation of OMI operational standard NO<sub>2</sub>

88 column retrievals using in situ and surface-based NO<sub>2</sub> observations, *Atmospheric Chemistry and*  
89 *Physics*, 14, 11587-11609, 10.5194/acp-14-11587-2014, 2014.

90 Laughner, J. L., Zhu, Q., and Cohen, R. C.: The Berkeley High Resolution Tropospheric NO<sub>2</sub>  
91 product, *Earth System Science Data*, 10, 2069-2095, 10.5194/essd-10-2069-2018, 2018.

92 Lee, C., Martin, R. V., van Donkelaar, A., Richter, A., Burrows, J. P., and Kim, Y. J.: Remote  
93 Sensing of Tropospheric Trace Gases (NO<sub>2</sub> and SO<sub>2</sub>) from SCIAMACHY, in: *Atmospheric and*  
94 *Biological Environmental Monitoring*, Springer, 63-72, 2009.

95 Marchenko, S., Krotkov, N. A., Lamsal, L. N., Celarier, E. A., Swartz, W. H., and Bucsela, E. J.:  
96 Revising the slant column density retrieval of nitrogen dioxide observed by the Ozone  
97 Monitoring Instrument, *Journal of Geophysical Research: Atmospheres*, 120, 5670-5692,  
98 10.1002/2014JD022913, 2015.

99 Oetjen, H., Baidar, S., Krotkov, N. A., Lamsal, L. N., Lechner, M., and Volkamer, R.: Airborne  
100 MAX - DOAS measurements over California: Testing the NASA OMI tropospheric NO<sub>2</sub>  
101 product, *Journal of Geophysical Research: Atmospheres*, 118, 7400-7413, 10.1002/jgrd.50550,  
102 2013.

103 Tilstra, L. G., Tuinder, O. N. E., Wang, P., and Stammes, P.: Surface reflectivity climatologies  
104 from UV to NIR determined from Earth observations by GOME - 2 and SCIAMACHY, *Journal*  
105 *of Geophysical Research: Atmospheres*, 122, 4084-4111, 10.1002/2016JD025940, 2017.

106 Tong, D., Lamsal, L., Pan, L., Ding, C., Kim, H., Lee, P., Chai, T., Pickering, K. E., and Stajner,  
107 I.: Long-term NO<sub>x</sub> trends over large cities in the United States during the great recession:  
108 Comparison of satellite retrievals, ground observations, and emission inventories, *Atmospheric*  
109 *Environment*, 107, 70-84, 10.1016/j.atmosenv.2015.01.035, 2015.

110 Veefkind, J. P., de Haan, J. F., Sneep, M., and Levelt, P. F.: Improvements to the OMI O<sub>2</sub>-O<sub>2</sub>  
111 operational cloud algorithm and comparisons with ground-based radar-lidar observations, *Atmos.*  
112 *Meas. Tech.*, 9, 6035-6049, 10.5194/amt-9-6035-2016, 2016.

113 Wang, P., Stammes, P., van der A, R., Pinardi, G., and van Roozendael, M.: FRESCO+: an  
114 improved O<sub>2</sub> A-band cloud retrieval algorithm for tropospheric trace gas retrievals, *Atmos.*  
115 *Chem. Phys.*, 8, 6565-6576, 10.5194/acp-8-6565-2008, 2008.

116 Wang, Y., Beirle, S., Lampel, J., Koukouli, M., De Smedt, I., Theys, N., Ang, L., Wu, D., Xie, P.,  
117 and Liu, C.: Validation of OMI, GOME-2A and GOME-2B tropospheric NO<sub>2</sub>, SO<sub>2</sub> and HCHO  
118 products using MAX-DOAS observations from 2011 to 2014 in Wuxi, China: investigation of the  
119 effects of priori profiles and aerosols on the satellite products, *Atmospheric Chemistry and*  
120 *Physics*, 17, 5007, 10.5194/acp-17-5007-2017, 2017.

121 Williams, J. E., Scheele, M. P., van Velthoven, P. F. J., Cammas, J.-P., Thouret, V., Galy-Lacaux,  
122 C., and Volz-Thomas, A.: The influence of biogenic emissions from Africa on tropical  
123 tropospheric ozone during 2006: a global modeling study, *Atmospheric Chemistry and Physics*, 9,  
124 5729-5749, 10.5194/acp-9-5729-2009, 2009.



125 Williams, J. E., Boersma, K. F., Sager, P. L., and Verstraeten, W. W.: The high-resolution version  
 126 of TM5-MP for optimized satellite retrievals: description and validation, *Geoscientific Model*  
 127 *Development*, 10, 721-750, 10.5194/gmd-10-721-2017, 2017.

128 Zara, M., Boersma, K. F., De Smedt, I., Richter, A., Peters, E., Van Geffen, J. H. G. M., Beirle,  
 129 S., Wagner, T., Van Roozendael, M., and Marchenko, S.: Improved slant column density retrieval  
 130 of nitrogen dioxide and formaldehyde for OMI and GOME-2A from QA4ECV: intercomparison,  
 131 uncertainty characterization, and trends, *Meas. Tech. Discuss.*, 1-47, 10.5194/amt-11-4033-2018,  
 132 2018.

133 Zhang, R., Wang, Y., Smeltzer, C., Qu, H., Koshak, W., and Boersma, K. F.: Comparing OMI-  
 134 based and EPA AQS in situ NO<sub>2</sub> trends: towards understanding surface NO<sub>x</sub> emission changes,  
 135 *Atmospheric Measurement Techniques*, 11, 3955-3967, 10.5194/amt-11-3955-2018, 2018.

136
