# Supplementary material for: Inferring the anthropogenic NO x emission trend over the United States during 2003–2017 from satellite observations: Was there a flattening of the emission tend after the Great Recession?
Source: Copernicus journal article supplement (doi:10.5194/acp-2019-472), 2019-07-16
Supplement: Supplementary file [file acp-2019-472-AC7-supplement.pdf]

1 **Inferring the anthropogenic NO<sub>x</sub> emission trend**  
2 **over the United States during 2003 - 2017 from**  
3 **satellite observations: Was there a flattening of**  
4 **the emission trend after the Great Recession?**

5 Jianfeng Li<sup>1</sup>, Yuhang Wang<sup>1\*</sup>

6 <sup>1</sup> School of Earth and Atmospheric Sciences, Georgia Institute of Technology, Atlanta, Georgia,  
7 USA

8 \* *Correspondence to* Yuhang Wang (yuhang.wang@eas.gatech.edu)

9

10

## 11 **Abstract**

12 We illustrate the nonlinear relationships among anthropogenic NO<sub>x</sub> emissions, NO<sub>2</sub>  
13 tropospheric vertical column densities (TVCDs), and NO<sub>2</sub> surface concentrations using model  
14 simulations for July 2011 over the contiguous United States (CONUS). The variations of NO<sub>2</sub>  
15 surface concentrations and TVCDs are generally consistent and reflect well anthropogenic NO<sub>x</sub>  
16 emission variations for high-anthropogenic-NO<sub>x</sub> emission regions. For low-anthropogenic-NO<sub>x</sub>  
17 emission regions, however, nonlinearity in the emission-TVCD relationship due to emissions  
18 from lightning and soils, chemistry, and physical processes makes it difficult to use satellite  
19 observations to infer anthropogenic NO<sub>x</sub> emission changes. The analysis is extended to 2003 –  
20 2017. Similar variations of NO<sub>2</sub> surface measurements and coincident satellite NO<sub>2</sub> TVCDs over  
21 urban regions are in sharp contrast to the large variation differences between surface and satellite  
22 observations over rural regions. We find a continuous decrease of anthropogenic NO<sub>x</sub> emissions  
23 after 2011 by examining surface and satellite measurements in CONUS urban regions, but the  
24 decreasing rate is lower by 9% - 46% than the pre-2011 period.

25

## 26 **1. Introduction**

27 Anthropogenic emissions of nitrogen oxides ( $\text{NO}_x = \text{NO}_2 + \text{NO}$ ) adversely affect the  
28 environment, not only because of their direct detrimental impacts on human health (Greenberg et  
29 al., 2016; Greenberg et al., 2017; Heinrich et al., 2013; Weinmayr et al., 2009), but also their  
30 fundamental roles in the formation of ozone, acid rain, and fine particles which are unfavorable to  
31 human health, ecosystem stabilities, and climate change (Crouse et al., 2015; Kampa and  
32 Castanas, 2008; Myhre et al., 2013; Pandey et al., 2005; Singh and Agrawal, 2007). About 48.8  
33  $\text{Tg N yr}^{-1}$  of  $\text{NO}_x$  are emitted globally from both anthropogenic (77%) and natural (23%) sources,  
34 such as fossil fuel combustion, biomass and biofuel burning, soil bacteria, and lightning (Seinfeld  
35 and Pandis, 2016). 3.85 Tg N and 0.24 Tg N of anthropogenic and ~~natural-soil~~  $\text{NO}_x$ , respectively,  
36 were emitted from the U.S. in 2014 on the basis of the 2014 National Emission Inventory  
37 (NEI2014); vehicle sources and fuel combustions accounted for 93% of the total anthropogenic  
38  $\text{NO}_x$  emissions (EPA, 2017).

39 The U.S. anthropogenic  $\text{NO}_x$  emissions during the 2010s declined dramatically compared to  
40 the mid-2000s (EPA, 2018; Xing et al., 2013) due to stricter air quality regulations and emission  
41 control technology improvements, such as the phase-in of Tier II vehicles during 2004 – 2009 and  
42 the switch of power plants from coal to natural gas (De Gouw et al., 2014; McDonald et al.,  
43 2018). The overall reduction (about 30% - 50%) of anthropogenic  $\text{NO}_x$  emissions from the mid-  
44 2000s to the 2010s was corroborated by observed decreasing of vehicle  $\text{NO}_x$  emission factors,  
45  $\text{NO}_2$  surface concentrations, nitrate wet deposition flux (Figure S1), and  $\text{NO}_2$  tropospheric  
46 vertical column densities (TVCDs) (Bishop and Stedman, 2015; Georgoulas et al., 2019; Li et  
47 al., 2018; McDonald et al., 2018; Miyazaki et al., 2017; Russell et al., 2012; Tong et al., 2015).  
48 However, the detailed  $\text{NO}_x$  emission changes after the Great Recession (from December 2007 to  
49 June 2009) are highly uncertain. On the one hand, the U.S. Environmental Protection Agency

50 (EPA) estimated that the Great Recession had a slight impact on the anthropogenic NO<sub>x</sub> emission  
51 trend, and the anthropogenic NO<sub>x</sub> emissions decreased steadily from 2002 to 2017 (Figure S24),  
52 although the emission decrease rate slowed down by about 20% after 2010 (-5.8% yr<sup>-1</sup> for 2002 –  
53 2010, and -4.7% yr<sup>-1</sup> for 2010 – 2017, Table 1) (EPA, 2018). Fuel-based emission estimates in  
54 Los Angeles also showed a steady decrease of anthropogenic NO<sub>x</sub> emissions after 2000 and a  
55 small impact of the Great Recession on anthropogenic NO<sub>x</sub> emission decrease trend (Hassler et  
56 al., 2016). The continuous decrease of anthropogenic NO<sub>x</sub> emissions was consistent with the  
57 ongoing reduction of vehicle emissions (McDonald et al., 2018). On the other hand, Miyazaki et  
58 al. (2017) and Jiang et al. (2018) found that the U.S. NO<sub>x</sub> emissions derived from satellite NO<sub>2</sub>  
59 TVCDs, including OMI (the Ozone Monitoring Instrument), SCIAMACHY (SCanning Imaging  
60 Absorption SpectroMeter for Atmospheric CHartography), and GOME-2A (Global Ozone  
61 Monitoring Experiment – 2 onboard METOP-A), were almost flat from 2010 - 2015 and  
62 suggested that the decrease of NO<sub>x</sub> emissions was only significant before 2010, which was  
63 completely different from the bottom-up and fuel-based emission estimates.

64 A complicating factor in inferring anthropogenic NO<sub>x</sub> emission trends from the observations  
65 of NO<sub>2</sub> surface concentrations and satellite NO<sub>2</sub> TVCDs is the nonlinearity in NO<sub>x</sub> chemistry (Gu  
66 et al., 2013; Gu et al., 2016; Lamsal et al., 2011). Although the decrease rates of both NO<sub>2</sub> surface  
67 concentrations and coincident OMI NO<sub>2</sub> TVCDs slowed down after the Great Recession over the  
68 United States, Tong et al. (2015), Lamsal et al. (2015) and Jiang et al. (2018) found that the  
69 slowdown of the decrease rates derived from NO<sub>2</sub> surface concentrations is 12% - 79% less than  
70 those of NO<sub>2</sub> TVCDs (Table 1). Secondly, the slowdown of the decrease rates of NO<sub>2</sub> surface  
71 concentrations and OMI TVCDs over cities and power plants (Russell et al., 2012; Tong et al.,  
72 2015) is significantly less than those over the whole contiguous United States (CONUS) (Jiang et  
73 al., 2018; Lamsal et al., 2015). Moreover, Zhang et al. (2018) found that filtering out lightning-

74 affected measurements could significantly improve the comparison of NO<sub>2</sub> surface concentration  
75 and OMI NO<sub>2</sub> TVCD trends over the CONUS.

76 In this study, we carefully investigate the relationships among anthropogenic NO<sub>x</sub> emissions,  
77 NO<sub>2</sub> surface concentrations, and NO<sub>2</sub> TVCDs over the CONUS and evaluate the impact of the  
78 relationships on inferring anthropogenic NO<sub>x</sub> emission changes and trends from surface and  
79 satellite observations. Section 2 describes the model and datasets used in this study, including the  
80 Regional chEmistry and trAnsport Model (REAM), the EPA Air Quality System (AQS) NO<sub>2</sub>  
81 surface observations, and NO<sub>2</sub> TVCD products from OMI, GOME-2A, GOME-2B (GOME2  
82 onboard METOP-B), and SCIAMACHY. In Section 3, we examine the nonlinear relationships  
83 among anthropogenic NO<sub>x</sub> emissions, NO<sub>2</sub> surface concentrations, and NO<sub>2</sub> TVCDs using model  
84 simulations. Accounting for the effects of chemical nonlinearity, we then investigate the  
85 anthropogenic NO<sub>x</sub> emission trends and changes from 2003 – 2017 over the CONUS. Finally,  
86 section 4 gives a summary of the study.

## 87 **2. Model and Data Description**

### 88 **2.1 REAM**

89 The REAM model has been applied and evaluated in many research applications including  
90 ozone simulation and forecast, emission inversion and evaluations, and ~~mechanical~~mechanistic  
91 studies of chemical and physical processes (Alkuwari et al., 2013; Cheng et al., 2017; Cheng et  
92 al., 2018; Choi et al., 2008a; Choi et al., 2008b; Gu et al., 2013; Gu et al., 2014; Koo et al., 2012;  
93 Liu et al., 2012; Liu et al., 2014; Wang et al., 2007; Yang et al., 2011; Zhang et al., 2017; Zhang  
94 et al., 2018; Zhang and Wang, 2016; Zhao and Wang, 2009; Zhao et al., 2009a; Zhao et al.,  
95 2010). REAM used in this work, the model domain of which is shown in Figure 3, has 30 vertical  
96 layers in the troposphere, and the horizontal resolution is 36 × 36 km<sup>2</sup>. The model is driven by

97 meteorology fields from a Weather and Research Forecasting (WRF, version 3.6) model  
98 simulation initialized and constrained by the NCEP coupled forecast system model version 2  
99 (CFSv2) products (Saha et al., 2011). The chemistry mechanism is based on GEOS-Chem v11.01  
100 with updated reaction rates and aerosol uptake of isoprene nitrates (Fisher et al., 2016). Chemistry  
101 boundary conditions and initializations are from a GEOS-Chem ( $2^\circ \times 2.5^\circ$ ) simulation. Hourly  
102 anthropogenic emissions on weekdays are based on the 2011 National Emission Inventory  
103 (NEI2011), while weekend anthropogenic emissions are set to be two-thirds of the weekday  
104 emissions (Beirle et al., 2003; Choi et al., 2012). Biogenic VOC emissions are estimated using the  
105 Model of Emissions of Gases and Aerosols from Nature (MEGAN) v2.10 (Guenther et al., 2012).  
106  $\text{NO}_x$  emissions from soils are based on the Yienger and Levy (YL) scheme (Li et al., 2019;  
107 Yienger and Levy, 1995). The cloud-to-ground (CG) lightning flashes are calculated following  
108 Choi et al. (2005) and Zhao et al. (2009a) with the parameterization of CG flash rate as a function  
109 of convective mass fluxes and convective available potential energy (CAPE). The ratios of intra-  
110 cloud (IC) lightning flashes to CG flashes are parameterized as a function of the height between  
111 the freezing layer and the cloud top (Luo et al., 2017; Price and Rind, 1992). In this study, 250  
112 moles of NO are emitted per CG or IC flash (Zhao et al., 2009a). As a result, on weekdays in July  
113 2011, REAM has mean anthropogenic  $\text{NO}_x$  emissions of  $7.4 \times 10^{10}$  molecules  $\text{cm}^{-2} \text{s}^{-1}$ , mean soil  
114  $\text{NO}_x$  emissions of  $1.2 \times 10^{10}$  molecules  $\text{cm}^{-2} \text{s}^{-1}$ , and mean lightning  $\text{NO}_x$  emissions of  $3.4 \times 10^{10}$   
115 molecules  $\text{cm}^{-2} \text{s}^{-1}$  over the CONUS.

## 116 **2.2 Satellite $\text{NO}_2$ TVCDs**

117 In this study, we use  $\text{NO}_2$  TVCD products from four satellite ~~measurements-sensors~~ in the  
118 past decade, including SCIAMACHY, GOME-2A, GOME-2B, and OMI, the spectrometers  
119 onboard sun-synchronous satellites to monitor atmospheric trace gases. The SCIAMACHY  
120 ~~instrument~~ onboard the Environmental Satellite (ENVISAT) has an equator overpass time of  
121 10:00 Local time (LT) and a nadir pixel resolution of  $60 \times 30 \text{ km}^2$ . The GOME-2 instruments on

122 Metop-A (named as GOME-2A) and Metop-B (GOME-2B) satellites cross the equator at 9:30 LT  
123 and have a nadir resolution of  $80 \times 40 \text{ km}^2$ . After July 15, 2013, the nadir resolution of GOME-  
124 2A became  $40 \times 40 \text{ km}^2$  with a smaller scanning swath. The OMI onboard the EOS-Aura satellite  
125 has a nadir resolution of  $24 \times 13 \text{ km}^2$  and overpasses the equator around 13:45 LT. More detailed  
126 information about these instruments is summarized in Table S1. These instruments measure  
127 ~~transmitted, backscattered, and reflected~~ solar radiation from the atmosphere in the ultraviolet and  
128 visible wavelength. The radiation measurements in the wavelength of 402 - 465 nm are then used  
129 to retrieve  $\text{NO}_2$  VCDs. The retrieval process consists of three steps: 1) converting radiation  
130 observations to  $\text{NO}_2$  slant column densities (SCDs) by using the Differential Optical Absorption  
131 Spectroscopy (DOAS) spectral fitting method; 2) separating tropospheric SCDs and stratospheric  
132 SCDs from the total  $\text{NO}_2$  SCDs; 3) dividing the  $\text{NO}_2$  tropospheric SCDs by the tropospheric air  
133 mass factors (AMF) to compute VCDs.

134 The product archives we use in this study include GOME-2B (TM4NO2A v2.3),  
135 SCIAMACHY (QA4ECV v1.1), GOME-2A (QA4ECV v1.1), OMI (QA4ECV v1.1, hereafter  
136 referred to as OMI-QA4ECV), OMNO2 (SPv3, hereafter referred to as OMI-NASA), and the  
137 Berkeley High-Resolution  $\text{NO}_2$  products (v3.0B, hereafter referred to as OMI-BEHR). OMI-  
138 BEHR uses the tropospheric SCDs from OMI-NASA products but updates some inputs for the  
139 tropospheric AMF calculation (Laughner et al., 2018). These product archives have been  
140 previously validated (Boersma et al., 2018; Drosoglou et al., 2017; Drosoglou et al., 2018;  
141 Krotkov et al., 2017; Laughner et al., 2018; Wang et al., 2017; Zara et al., 2018). Generally, the  
142 pixel-size uncertainties of these products are  $> 30\%$  over polluted regions under clear-sky  
143 conditions. We summarize the basic information about these products in Table S2. To keep the  
144 high quality and sampling consistency of  $\text{NO}_2$  TVCD datasets, we chose pixel-size  $\text{NO}_2$  TVCD  
145 data using the criteria listed in Table S3. After the selection, we re-grid~~ded~~ the pixel-size data into  
146 the REAM  $36 \times 36 \text{ km}^2$  grid cells and calculate the seasonal means of each grid cell with

147 corresponding daily values on weekdays (winter: January, February, and December; spring:  
148 March, April, and May; summer: June, July, and Autumn; autumn: September, October, and  
149 November). We excluded weekend data in this study to minimize the impacts of weekend NO<sub>x</sub>  
150 emission reduction, leading to different NO<sub>2</sub> TVCDs between weekdays and weekends (Figure  
151 [S32](#)).

152 Satellite TVCD measurements can show large variations and apparent discontinuities due in  
153 part to the effects of cloud, lightning NO<sub>x</sub>, the shift of satellite pixel coverage, and retrieval  
154 uncertainties (Figure [S32](#); e.g., (Boersma et al., 2018; Zhang et al., 2018)). However, continuous  
155 and consistent measurements are required for reliable trend analyses. In addition to the criteria of  
156 data selection in Table S3, we compute the seasonal relative 90<sup>th</sup> percentile confidence interval,  
157 defined as  $RCI = (X(95^{th} \text{ percentile}) - X(5^{th} \text{ percentile})) / \text{mean}(X)$ , where X is the daily NO<sub>2</sub>  
158 TVCD for a given season. To compute the seasonal trend, we require that RCI is < 50% for the  
159 selected season every year in the analysis period (Table S3). About 45% of data are removed as a  
160 result.

### 161 **2.3 Surface NO<sub>2</sub> measurements**

162 Hourly surface NO<sub>2</sub> measurements from 2003 - 2017 are from the EPA AQS monitoring  
163 network (archived on <https://www.epa.gov/outdoor-air-quality-data>). Most AQS monitoring sites  
164 use the Federal Reference Method (FRM) — gas-phase chemiluminescence to measure NO<sub>2</sub>. Few  
165 sites use the Federal Equivalent Method (FEM) – photolytic-chemiluminescence or the Cavity  
166 Attenuated Phase Shift Spectroscopy (CAPS) method. FRM and FEM are indirect methods, in  
167 which NO<sub>2</sub> is first converted to NO and then NO is measured through chemiluminescence  
168 measurement of NO<sub>2</sub>\* produced by NO + O<sub>3</sub>. The difference is that FRM uses heated  
169 reducers/catalysts for the conversion of NO<sub>2</sub> to NO and FEM uses photolysis of NO<sub>2</sub> to NO. The  
170 conversion to NO in the FRM instruments is not specific to NO<sub>2</sub>, and non-NO<sub>x</sub> active nitrogen



171 compounds ( $\text{NO}_z$ ) can also be reduced by the catalysts, which would cause high biases of  $\text{NO}_2$   
172 measurements, while the FEM method is sensitive to the photolysis conversion efficiency of  $\text{NO}_2$   
173 to NO (Beaver et al., 2012; Beaver et al., 2013; Lamsal et al., 2015). The CAPS method directly  
174 determines  $\text{NO}_2$  concentrations based on a  $\text{NO}_2$ -induced phase shift measured by a photodetector.  
175 The CAPS instrument operates at a wavelength of about 450 nm and may overestimate  $\text{NO}_2$   
176 concentrations due to absorption of other molecules at the same wavelength (Beaver et al., 2012;  
177 Beaver et al., 2013; Keabian et al., 2005).

178 Due to the different characteristics of the above three methods and demonstrated biases  
179 between the FRM and the FEM by Lamsal et al. (2015), we firstly investigate the measurement  
180 discrepancies among the above three methods. There are three sites having FRM and FEM  
181 measurements simultaneously during some periods from 2013 - 2014, two sites having both FRM  
182 and CAPS data during some periods from 2015 – 2016, and one site using all three measurement  
183 methods during some periods in 2015. Figure S43 shows the hourly averaged ratios of FEM and  
184 CAPS to FRM data, respectively, for 4 seasons during 2013 – 2016. The CAPS/FRM ratios are in  
185 the range of 0.94 – 1.06 and the FEM/FRM ratios of 0.86 – 1.11. Furthermore, Zhang et al.  
186 (2018) discussed that the relative trends are not affected by scaling the observation data. As in the  
187 work by Zhang et al. (2018), we analyze the relative trends in the surface  $\text{NO}_2$  data. We,  
188 therefore, did not scale the FRM data. At sites with FEM or CAPS measurements, we use these  
189 measurements in place of FRM data. If both FEM and CAPS data are available, we use the  
190 averages of the two datasets.

191 Since  $\text{NO}_2$  surface concentrations have significant diurnal variations (Figure S54), we  
192 choose the data at 9:00-10:00 LT for comparison with GOME-2A/2B data, 10:00-11:00 LT for  
193 comparison with SCIAMACHY data, and 13:00-14:00 LT for OMI data. The seasonal  $RCI <$   
194 50% requirement is also used here to be consistent with the analysis of satellite TVCD data, and  
195 thus about 1.5% of the data are removed. We also require that the measurement site must have

196 valid measurements in the aforementioned 3 hours for at least one season from 2003 – 2017. The  
197 locations of the 179 selected sites using the site selection criteria are shown in Figure 1. The  
198 region definitions follow the U.S. Census Bureau ([https://www2.census.gov/geo/pdfs/maps-](https://www2.census.gov/geo/pdfs/maps-data/maps/reference/us_regdiv.pdf)  
199 [data/maps/reference/us\\_regdiv.pdf](https://www2.census.gov/geo/pdfs/maps-data/maps/reference/us_regdiv.pdf)).

## 200 **3. Results and Discussions**

### 201 **3.1 Nonlinear relationships among anthropogenic NO<sub>x</sub> emissions, NO<sub>2</sub> surface** 202 **concentrations, and NO<sub>2</sub> TVCDs**

203 NO<sub>2</sub> surface concentrations and NO<sub>2</sub> TVCD are not linearly correlated with NO<sub>x</sub> emissions  
204 due in part to chemical nonlinearity, wet and dry depositions, transport effects, background  
205 sources (Gu et al., 2013; Lamsal et al., 2011). Therefore, it is necessary to first investigate the  
206 nonlinearities among NO<sub>x</sub> emissions, NO<sub>2</sub> surface concentrations, and TVCDs over the CONUS  
207 before we compare the trends between NO<sub>2</sub> surface concentrations and TVCDs. The nonlinearity  
208 between NO<sub>x</sub> emission and NO<sub>2</sub> TVCD is analyzed by examining the local sensitivity of NO<sub>2</sub>  
209 TVCD to NO<sub>x</sub> emissions (Gu et al., 2013; Lamsal et al., 2011; Tong et al., 2015), which is  
210 defined as  $\beta$  in Equation (1). We further define  $\gamma$  as the sensitivity of NO<sub>2</sub> surface concentration  
211 to NO<sub>x</sub> emission:

$$212 \quad \frac{\Delta E}{E} = \beta \frac{\Delta \Omega}{\Omega} \quad (1)$$

$$213 \quad \frac{\Delta E}{E} = \gamma \frac{\Delta c}{c} \quad (2)$$

214 where  $E$  denotes NO<sub>x</sub> emission and  $\Delta E$  denotes the change of NO<sub>x</sub> emission;  $\Omega$  denotes NO<sub>2</sub>  
215 TVCD,  $c$  denotes surface NO<sub>2</sub> concentration, and  $\Delta \Omega$  and  $\Delta c$  denote the corresponding changes.

216 We computed  $\beta$  and  $\gamma$  values for July 2011 over the CONUS using REAM. To compute  
217 local  $\beta$  and  $\gamma$  values, we added another independent group of chemistry species (“group 2”) in  
218 REAM in order to compute the standard and sensitivity simulations concurrently. The original  
219 chemical species in the model (“group 1”) were used in the standard simulation. For group 2  
220 chemical species, anthropogenic  $\text{NO}_x$  emissions were reduced by 15%. In the model simulation,  
221 we first computed the advection of group 1 tracers. The horizontal tracer fluxes were therefore  
222 available. All influxes into a grid cell for group 2 tracer simulation were from group 1 tracer  
223 simulation; only outfluxes were computed using group 2 tracers. The outflux was one way in that  
224 nitrogen species were transported out but the transport did not affect adjacent grid cells because  
225 the influxes were from group 1 tracer simulation. Using this procedure, the effects of  
226 anthropogenic  $\text{NO}_x$  emission reduction were localized. The  $\beta$  and  $\gamma$  values were computed by the  
227 ratio of TVCD and surface concentration changes to 15% change of anthropogenic  $\text{NO}_x$   
228 emissions, respectively.

229 Figure 2 shows the distributions of our  $\beta$  and  $\gamma$  ratios as a function of anthropogenic  $\text{NO}_x$   
230 emissions for July 2011 over the CONUS. Results essentially the same as Figure 2 were obtained  
231 when a perturbation of 10% was used for anthropogenic  $\text{NO}_x$  emissions. Figure S6 shows the  
232 distributions of  $\text{NO}_2$  TVCD fraction in the boundary layer at 13:00 – 14:00 LT and 10:00 – 11:00  
233 LT, and the fraction of soil  $\text{NO}_x$  emissions in all surface sources (soil + anthropogenic) on  
234 weekdays for July 2011, respectively. In Figure S7, we analyzed the contributions of background  
235 sources and non-emission factors (transport, chemistry, and wet and dry depositions) to the  
236 nonlinear relationships ( $\beta$  and  $\gamma$ ) among anthropogenic  $\text{NO}_x$  emissions,  $\text{NO}_2$  surface  
237 concentrations, and  $\text{NO}_2$  TVCDs. While the model simulation is for one summer month, several  
238 key points on the surface and column concentration sensitivities to anthropogenic  $\text{NO}_x$  emissions  
239 have implications for comparing the trends of AQS and satellite TVCD data. (1) Both  $\beta$  and  $\gamma$   
240 values are negatively correlated with anthropogenic  $\text{NO}_x$  emissions due to chemical nonlinearity.

241 transport. and background NO<sub>x</sub> contributions (Figures 2, S6, and S7) (Gu et al., 2016; Lamsal et  
242 al., 2011). It is consistent with the distribution of  $\beta$  as a function of NO<sub>x</sub> emissions in China (Gu  
243 et al., 2013), although the  $\beta$  ratios for the US are generally larger than for China due primarily to  
244 different emission distributions of NO<sub>x</sub> and VOCs and regional circulation patterns (Zhao et al.,  
245 2009b). (2) The uncertainties of  $\beta$  and  $\gamma$  values increase significantly as anthropogenic NO<sub>x</sub>  
246 emissions decrease, which means regions with low anthropogenic NO<sub>x</sub> emissions are more  
247 sensitive to environmental conditions, such as NO<sub>x</sub> transport from nearby regions which may  
248 even produce negative  $\beta$  and  $\gamma$  values (Figures 2 and S7). (3) The value of  $\gamma$  is generally less than  
249  $\beta$ , especially for low-anthropogenic-NO<sub>x</sub> emission regions, which reflects the significant  
250 contribution of free tropospheric NO<sub>2</sub> to NO<sub>2</sub> TVCD but not to NO<sub>2</sub> surface concentrations  
251 (Figures 2, S6, and S7). (4) The variations of  $\beta$  and  $\gamma$  values in anthropogenic NO<sub>x</sub> emission bins  
252 tend to be larger at 10:00 – 11:00 than at 13:00 – 14:00 LT, reflecting a stronger transport effect  
253 due to weaker chemical losses at 10:00 – 11:00 (Figure 2). (5) Both  $\beta$  and  $\gamma$  values are  
254 significantly less than 1 at 13:00 – 14:00 LT ( $\beta = 0.74$  and  $\gamma = 0.84$ ) when anthropogenic NO<sub>x</sub>  
255 emissions are  $> 4 \times 10^{12}$  molecules cm<sup>-2</sup> s<sup>-1</sup>, but they are close to 1 at 10:00 – 11:00 LT ( $\beta = 0.96$   
256 and  $\gamma = 1.02$ ), which reflect stronger chemistry nonlinearity at 13:00 – 14:00 than in the morning  
257 (Figure 2). (6) Both background sources and non-emission factors contribute much more to  $\beta$  and  
258  $\gamma$  values in low-anthropogenic-NO<sub>x</sub> emission regions than in high-anthropogenic-NO<sub>x</sub> emission  
259 regions (Figure S7). (7) Generally, non-emission factors contribute more to  $\beta$  and  $\gamma$  values than  
260 background sources in low-anthropogenic-NO<sub>x</sub> emission regions (Figures S7c and S7d) except  
261 for the first bin where background sources contribute more to  $\beta$  and  $\gamma$  values than non-emission  
262 factors at 10:00 – 11:00, which is partly caused by some grid cells with extremely low  
263 anthropogenic NO<sub>x</sub> emissions, increasing the mean contributions of background sources in the  
264 first bin.

265 The largely varying  $\beta$  and  $\gamma$  values for anthropogenic  $\text{NO}_x$  emissions  $< 10^{11}$  molecules  $\text{cm}^{-2}$   
266  $\text{s}^{-1}$  imply that the trends derived from satellite TVCD data do not directly represent anthropogenic  
267  $\text{NO}_x$  emissions and that the variations of TVCD data may not be comparable to the corresponding  
268 surface  $\text{NO}_2$  concentrations. We define a region “urban” if anthropogenic  $\text{NO}_x$  emissions from  
269 NEI2011 are  $> 10^{11}$  molecules  $\text{cm}^{-2} \text{s}^{-1}$ . All the other regions are defined as “rural”. Figure 3  
270 shows the distributions of anthropogenic  $\text{NO}_x$  emissions and urban and rural regions defined in  
271 this study. Such defined urban regions account for 69.8% of the total anthropogenic  $\text{NO}_x$   
272 emissions over the CONUS, the trend of which is, therefore, representative of anthropogenic  
273 emission changes. A caveat is that some “urban” regions would become “rural” if anthropogenic  
274  $\text{NO}_x$  emissions decreased after 2011 as the EPA anthropogenic  $\text{NO}_x$  emission trend suggested  
275 (Figure S24). In a sensitivity study, we define an urban region using a stricter criterion of  
276 anthropogenic  $\text{NO}_x$  emissions  $> 2 \times 10^{11}$  molecules  $\text{cm}^{-2} \text{s}^{-1}$  and the analysis results are similar to  
277 those shown in the next section.

### 278 **3.2 Trend comparisons between $\text{NO}_2$ AQS surface concentrations and coincident** 279 **satellite $\text{NO}_2$ tropospheric VCD over urban and rural regions**

280 By using anthropogenic  $\text{NO}_x$  emissions of  $10^{11}$  molecules  $\text{cm}^{-2} \text{s}^{-1}$  as the threshold value, 157  
281 AQS sites are urban, and the rest 22 sites are rural. Their properties are summarized in Table 2.  
282 Figure 4 shows the relative annual variations of AQS  $\text{NO}_2$  surface measurements at 13:00 – 14:00  
283 and coincident OMI-QA4ECV  $\text{NO}_2$  TVCD data from 2005 – 2017 in each season for urban and  
284 rural regions. The contrast between the two regions is apparent in all seasons. For comparison  
285 purposes, we scale the time series of TVCD and AQS surface  $\text{NO}_2$  to their corresponding 2005  
286 values, and the resulting data are therefore unitless. Over urban regions,  $\text{NO}_2$  surface  
287 concentrations are highly correlated with  $\text{NO}_2$  TVCDs ( $\text{TVCD} = 1.03 \times \text{AQS} + 0.11$ ,  $R^2 = 0.98$ ),  
288 reflecting the comparable and stable  $\beta$  and  $\gamma$  values (Figure 2). However, over rural regions, the  
289 scaled TVCD data significantly deviate from AQS  $\text{NO}_2$  data ( $\text{TVCD} = 1.15 \times \text{AQS} + 0.09$ ,  $R^2 =$

290 0.87). It is noteworthy that the discrepancies between urban and rural data are smaller in winter  
291 than in spring, summer, and autumn due to a more dominant role of transport than chemistry and  
292 lower natural NO<sub>x</sub> emissions in winter.

293 We also examine the correlations of AQS NO<sub>2</sub> surface concentrations with coincident OMI-  
294 NASA, OMI-BEHR, SCIAMACHY, GOME-2A, and GOME-2B TVCD measurements. The  
295 results of OMI-NASA and OMI-BEHR are similar to those of OMI-QA4ECV (Figure 4).  
296 SCIAMACHY and GOME-2B TVCD observations at 9:00-11:00 LT also show large contrast  
297 between urban (SCIAMACHY: TVCD =  $0.92 \times \text{AQS} - 0.005$ ,  $R^2 = 0.94$ ; GOME-2B: TVCD =  
298  $0.54 \times \text{AQS} + 0.56$ ,  $R^2 = 0.96$ ) and rural regions (SCIAMACHY: TVCD =  $0.77 \times \text{AQS} + 0.83$ ,  $R^2$   
299 =  $0.63$ ; GOME-2B: TVCD =  $0.46 \times \text{AQS} + 0.73$ ,  $R^2 = 0.59$ ). The correlation of coincident  
300 GOME-2A NO<sub>2</sub> TVCD data with AQS surface concentrations is poor for rural (TVCD =  $0.65 \times$   
301  $\text{AQS} + 0.56$ ,  $R^2 = 0.44$ ) and urban (TVCD =  $0.31 \times \text{AQS} + 0.56$ ,  $R^2 = 0.21$ ) regions (Figure S85),  
302 which likely reflects the degradation of the GOME-2A instrument causing significant increase of  
303 NO<sub>2</sub> SCD uncertainties (Boersma et al., 2018). Therefore, we excluded GOME-2A in the analysis  
304 hereafter.

305 We further investigate ~~the sensitivities of~~ OMI-QA4ECV NO<sub>2</sub> TVCD relative annual  
306 variations from 2005 - 2017 ~~over the regions with~~ different anthropogenic NO<sub>x</sub> emissions ~~over~~  
307 ~~the CONUS~~ in Figure 5. We find clear flattening of NO<sub>2</sub> TVCD variations as anthropogenic NO<sub>x</sub>  
308 emissions decrease, which is consistent with the above analysis. Similar to Figure 4, the spread of  
309 TVCD variation is much less in winter than the other seasons. The differences between Figures 5  
310 and 4 are due to a much larger dataset used in the former than the latter. Only coincident AQS  
311 and OMI-QA4ECV data are used in Figure 4, but all OMI-KMNI data are used in Figure 5.

### 312 3.3 Trend analysis of AQS NO<sub>2</sub> surface concentrations, satellite TVCDs, and 313 updated EPA NO<sub>x</sub> emissions

314 We first updated the CEMS measurement data used in the EPA NO<sub>x</sub> emission trend datasets  
315 with the newest datasets obtained from <https://ampd.epa.gov/ampd/>. As shown in Figure S24, the  
316 updated CEMS data lead to a reduction of anthropogenic NO<sub>x</sub> emissions during the Great  
317 Recession (2008 – 2009) and a recovery period in 2010 – 2011. The sharp drop during the Great  
318 Recession and the flattening trend right after the Great Recession are captured by OMI NO<sub>2</sub> and  
319 SCIAMACHY TVCD products (Figures 4, 6, and S96) and AQS NO<sub>2</sub> surface measurements  
320 (Figures 4, 6, and S54) and are also noted by Russell et al. (2012) and Tong et al. (2015) (Table  
321 1).

322 In Figure 6, we show the comparisons among the relative variations of the updated EPA  
323 anthropogenic NO<sub>x</sub> emissions, AQS NO<sub>2</sub> surface measurements at 10:00-11:00 and 13:00-14:00,  
324 and coincident satellite NO<sub>2</sub> TVCDs for urban regions in 4 seasons from 2003 to 2017. Also  
325 shown are the comparisons among the updated EPA anthropogenic NO<sub>x</sub> emissions and satellite  
326 NO<sub>2</sub> TVCDs. There are many more data points for the latter comparison because the data  
327 selection is no longer limited to those coincident with the AQS surface data, and therefore, the  
328 uncertainty spread is much lower. The comparisons, in general, show consistent results that the  
329 updated EPA anthropogenic NO<sub>x</sub> emissions, AQS surface measurements, and satellite TVCD  
330 data are in agreement. The agreement of decreasing trends among the datasets is just as good for  
331 the post-2011 period as the pre-2011 period. This result differs from Miyazaki et al. (2017) and  
332 Jiang et al. (2018), who suggested no significant decreasing trend for OMI TVCD data and  
333 inversed NO<sub>x</sub> emissions after 2010. The disagreement can be explained by the results of Figure 5.  
334 Including the low anthropogenic NO<sub>x</sub> emission regions leads to underestimates of NO<sub>x</sub> decreases.  
335 Since the area of low anthropogenic NO<sub>x</sub> emission regions is larger than high anthropogenic NO<sub>x</sub>  
336 emission regions (Table 2), the arithmetic averaging will lead to a large weighting of rural

337 observations, which do not reflect anthropogenic NO<sub>x</sub> emission changes. Miyazaki et al. (2017)  
338 and Jiang et al. (2018) included all regions in their analyses, but we exclude rural regions. Figure  
339 S96 shows the seasonal variations if the TVCDs over rural regions are included; the result shows  
340 a much lower decreasing rate of TVCDs over the CONUS. The much slower satellite TVCD  
341 trends for regions with low NO<sub>x</sub> emissions was previously discussed by Zhang et al. (2018). In  
342 addition, Miyazaki et al. (2017) and Jiang et al. (2018) conducted NO<sub>x</sub> emission inversions by  
343 using the Model for Interdisciplinary Research on Climate (MIROC)-Chem with a coarse  
344 resolution of 2.8° × 2.8°, which was insufficient to separate urban and rural regions and might  
345 distort predicted NO<sub>2</sub> TVCDs and inversed NO<sub>x</sub> emissions due to nonlinear effects (Valin et al.,  
346 2011; Yu et al., 2016), which is another possible reason for their find of flattening NO<sub>x</sub> emission  
347 trends after 2010.

348 We summarize the decreasing rates of NO<sub>2</sub> after the Great Recession in Table 3. To  
349 minimize the effect of the sharp decrease and the subsequent recovery, we chose to analyze the  
350 post-2011 period. Table 3 summarizes the results for each season, while Table 1 gives the  
351 averaged annual decreasing trends. Generally, Tables 1 and 3 confirm the continuous decreases of  
352 AQS surface observations, satellite NO<sub>2</sub> TVCD, and updated EPA anthropogenic NO<sub>x</sub> emissions  
353 after 2011 as in Figure 6, but the decreasing rates are lower than the pre-2011 period. Over the  
354 AQS urban sites, the slowdown magnitudes are 9% for AQS surface observations and 20% - 40%  
355 for satellite NO<sub>2</sub> TVCD measurements, which may reflect in part smaller  $\gamma$  than  $\beta$  values (Table  
356 2). Our estimated slowdown magnitudes are significantly lower than Lamsal et al. (2015) and  
357 Jiang et al. (2018) ~~but comparable to the results by Tong et al. (2015)~~ (Table 1). ~~The agreement~~  
358 ~~with Tong et al. (2015) is because we select urban AQS sites based on anthropogenic NO<sub>x</sub>~~  
359 ~~emissions and they chose eight large cities, while Lamsal et al. (2015) and Jiang et al. (2018) used~~  
360 ~~all AQS sites., which might be caused by their different data processing methods, such as~~  
361 ~~including AQS sites with incomplete measurement records~~ (Silvern et al., 2019).



362 Over the CONUS urban regions, updated EPA anthropogenic NO<sub>x</sub> emissions show a  
363 slowdown of 22% compared to 29% - 46% for three OMI NO<sub>2</sub> TVCD products. The difference is  
364 partially due to the  $\beta$  ratio of  $2.53 \pm 1.00-9$  at 13:00 – 14:00 over the CONUS urban regions  
365 (Table 2). Satellite NO<sub>2</sub> TVCD measurement uncertainties also contribute to the difference. From  
366 2013 – 2017, GOME-2B NO<sub>2</sub> TVCDs decrease more than OMI products, especially in spring,  
367 autumn and winter (Tables 1 and 3). Finally, trend analyses in different regions (Figure 7 and  
368 Table S4) indicate that generally, the Midwest has the least slowdown of the decreasing rate for  
369 urban OMI NO<sub>2</sub> TVCD (-14% on average) after 2011 compared to the Northeast (-30%), South (-  
370 34%), and West (-28%).

371 The results presented in this study are qualitatively in agreement with the work by Silvern et  
372 al. (2019). The two studies were independent. Therefore, the foci of the studies are different  
373 despite reaching similar conclusions. While we focused on understanding the detailed data  
374 analysis of Jiang et al. (2018) and limited the use of model simulation results so that our results  
375 can be compared to the previous study directly, Silvern et al. (2019) relied more on multi-year  
376 model simulations. As a result, Silvern et al. (2019) can clearly identify the contributions of the  
377 NO<sub>2</sub> columns by natural emissions and make use of additional observations such as nitrate  
378 deposition fluxes. They also identified model biases in simulating the trends of NO<sub>2</sub> TVCDs by  
379 missing natural emissions in the free troposphere. Our study, on the other hand, explored the data  
380 analysis procedure through which the trend of anthropogenic emissions can be derived from  
381 satellite observations and its limitations.

## 382 **4. Conclusions**

383 Using model simulations for July 2017, we demonstrate the nonlinear relationship of NO<sub>2</sub>  
384 surface concentration and TVCD with anthropogenic NO<sub>x</sub> emissions. Over low anthropogenic  
385 NO<sub>x</sub> emission regions, the ratios of anthropogenic NO<sub>x</sub> emission changes to the changes of

386 surface concentrations ( $\gamma$ ) and TVCDs ( $\beta$ ) have very large variations and  $\beta > \gamma \gg 1$ .  
387 Therefore, for the same emission changes, surface concentration and TVCD changes are much  
388 smaller and variable than urban regions, making it difficult to use the observations to directly  
389 infer anthropogenic  $\text{NO}_x$  emission trends. We find that defining urban regions where  
390 anthropogenic  $\text{NO}_x$  emissions are  $> 10^{11}$  molecules  $\text{cm}^{-2} \text{s}^{-1}$  and using surface and TVCD  
391 observations over these regions can infer the trends that can be compared with the EPA emission  
392 trend estimates.

393 We evaluate the anthropogenic  $\text{NO}_x$  emission variations from 2003 – 2017 over the CONUS  
394 by using satellite  $\text{NO}_2$  TVCD products from GOME-2B, SCIAMACHY, OMI-QA4ECV, OMI-  
395 NASA, and OMI-BEHR, over the urban regions of CONUS. We find broad agreements among  
396 the decreases of AQS  $\text{NO}_2$  surface observations, satellite  $\text{NO}_2$  TVCD products, and the EPA  
397 anthropogenic  $\text{NO}_x$  emissions with the CEMS dataset updated. After 2011, they all show a  
398 slowdown of the decreasing rates. Over the AQS urban sites,  $\text{NO}_2$  surface concentrations have a  
399 slowdown of 9% and OMI products show a slowdown of 20% - 40%. Over the CONUS urban  
400 regions, OMI TVCD products indicate a slowdown of 29% - 46%, and the updated EPA  
401 anthropogenic  $\text{NO}_x$  emissions have a slowdown of 22%. The different slowdown magnitudes  
402 between OMI TVCD products and the other two datasets may be caused by the nonlinear  
403 response of TVCD to anthropogenic emissions and the uncertainties of satellite measurements  
404 (e.g., GOME-2B TVCD data show a larger decreasing trend than OMI products from 2013 –  
405 2017).

406 We did not find observation evidence supporting the notion that anthropogenic  $\text{NO}_x$   
407 emissions have not been decreasing after the Great Recession. In future studies, we recommend  
408 that the nonlinear relationships of  $\text{NO}_x$  emissions with  $\text{NO}_2$  TVCD and surface concentration be

409 carefully evaluated when applying satellite and surface measurements to infer the changes of  
410 anthropogenic NO<sub>x</sub> emissions.

#### 411 **Data availability**

412 The EPA AQS hourly surface NO<sub>2</sub> measurements are downloaded from  
413 [https://aqs.epa.gov/aqsweb/airdata/download\\_files.html#Raw](https://aqs.epa.gov/aqsweb/airdata/download_files.html#Raw). QA4ECV 1.1 NO<sub>2</sub> VCD products  
414 (OMI-QA4ECV, GOME-2A, and SCIAMACHY) are from <http://temis.nl/qa4ecv/no2col/data/>.  
415 GOME-2B NO<sub>2</sub> VCD products are from  
416 <http://www.temis.nl/airpollution/no2col/no2colgome2b.php>. OMI-BEHR and OMI-NASA  
417 archives are from <http://behr.cchem.berkeley.edu/DownloadBEHRData.aspx>. REAM simulation  
418 results for this study are available upon request.

#### 419 **Author contribution**

420 JL and YW designed the study. JL conducted model simulations and data analyses with  
421 discussions with YW. JL and YW wrote the manuscript.

#### 422 **Competing interests**

423 The authors declare that they have no conflict of interest.

#### 424 **Acknowledgments**

425 This work was supported by the NASA ACMAP Program. We thank Ruixiong Zhang for  
426 discussions with J. Li. Thank Benjamin Wells, Alison Eyth, Lee Tooty from EPA, the EPA  
427 MOVES team, Betty Carter from COORDINATING RESEARCH COUNCIL, INC., Brian  
428 McDonald from NOAA, and Zhe Jiang from University of Science and Technology of China for  
429 helping us an understanding of the NEI MOVES mobile source emissions.

430 **References**

- 431 Alkuwari, F. A., Guillas, S., and Wang, Y.: Statistical downscaling of an air quality model using  
432 Fitted Empirical Orthogonal Functions, *Atmos. Environ.*, 81, 1-10,  
433 10.1016/j.atmosenv.2013.08.031, 2013.
- 434 Beaver, M., Long, R., and Kronmiller, K.: Characterization and Development of Measurement  
435 Methods for Ambient Nitrogen Dioxide (NO<sub>2</sub>), National Air Quality Conference - Ambient Air  
436 Monitoring 2012, Denver, CO, US, 2012.
- 437 Beaver, M., Kronmiller, K., Duvall, R., Kaushik, S., Morphy, T., King, P., and Long, R.: Direct  
438 and Indirect Methods for the Measurement of Ambient Nitrogen Dioxide, AWMA Measurement  
439 Technologies meeting, Sacramento, CA, US, 2013.
- 440 Beirle, S., Platt, U., Wenig, M., and Wagner, T.: Weekly cycle of NO<sub>2</sub> by GOME measurements:  
441 A signature of anthropogenic sources, *Atmos. Chem. Phys.*, 3, 2225-2232, 10.5194/acp-3-2225-  
442 2003, 2003.
- 443 Bishop, G. A., and Stedman, D. H.: Reactive nitrogen species emission trends in three light-  
444 /medium-duty United States fleets, *Environ. Sci. Technol.*, 49, 11234-11240,  
445 10.1021/acs.est.5b02392, 2015.
- 446 Boersma, K. F., Eskes, H. J., Richter, A., De Smedt, I., Lorente, A., Beirle, S., van Geffen, J. H.,  
447 Zara, M., Peters, E., and Roozendaal, M. V.: Improving algorithms and uncertainty estimates for  
448 satellite NO<sub>2</sub> retrievals: results from the quality assurance for the essential climate variables  
449 (QA4ECV) project, *Atmos. Meas. Tech.*, 11, 6651-6678, 10.5194/amt-11-6651-2018, 2018.
- 450 Cheng, Y., Wang, Y., Zhang, Y., Chen, G., Crawford, J. H., Kleb, M. M., Diskin, G. S., and  
451 Weinheimer, A. J.: Large biogenic contribution to boundary layer O<sub>3</sub>-CO regression slope in  
452 summer, *Geophys. Res. Lett.*, 44, 7061-7068, 10.1002/2017GL074405, 2017.
- 453 Cheng, Y., Wang, Y., Zhang, Y., Crawford, J. H., Diskin, G. S., Weinheimer, A. J., and Fried, A.:  
454 Estimator of surface ozone using formaldehyde and carbon monoxide concentrations over the  
455 eastern United States in summer, *J. Geophys. Res.-Atmos.*, 123, 7642-7655,  
456 10.1029/2018JD028452, 2018.
- 457 Choi, Y., Wang, Y., Zeng, T., Martin, R. V., Kurosu, T. P., and Chance, K.: Evidence of lightning  
458 NO<sub>x</sub> and convective transport of pollutants in satellite observations over North America,  
459 *Geophys. Res. Lett.*, 32, 10.1029/2004GL021436, 2005.
- 460 Choi, Y., Wang, Y., Yang, Q., Cunnold, D., Zeng, T., Shim, C., Luo, M., Eldering, A., Bucsela,  
461 E., and Gleason, J.: Spring to summer northward migration of high O<sub>3</sub> over the western North  
462 Atlantic, *Geophys. Res. Lett.*, 35, 10.1029/2007GL032276, 2008a.
- 463 Choi, Y., Wang, Y., Zeng, T., Cunnold, D., Yang, E. S., Martin, R., Chance, K., Thouret, V., and  
464 Edgerton, E.: Springtime transitions of NO<sub>2</sub>, CO, and O<sub>3</sub> over North America: Model evaluation  
465 and analysis, *J. Geophys. Res.-Atmos.*, 113, 10.1029/2007JD009632, 2008b.

466 Choi, Y., Kim, H., Tong, D., and Lee, P.: Summertime weekly cycles of observed and modeled  
467 NO<sub>x</sub> and O<sub>3</sub> concentrations as a function of satellite-derived ozone production sensitivity and land  
468 use types over the Continental United States, *Atmos. Chem. Phys.*, 12, 6291-6307, 10.5194/acp-  
469 12-6291-2012, 2012.

470 Crouse, D. L., Peters, P. A., Hystad, P., Brook, J. R., van Donkelaar, A., Martin, R. V.,  
471 Villeneuve, P. J., Jerrett, M., Goldberg, M. S., and Pope III, C. A.: Ambient PM<sub>2.5</sub>, O<sub>3</sub>, and NO<sub>2</sub>  
472 exposures and associations with mortality over 16 years of follow-up in the Canadian Census  
473 Health and Environment Cohort (CanCHEC), *Environ. Health Perspect.*, 123, 1180,  
474 10.1289/ehp.1409276, 2015.

475 De Gouw, J. A., Parrish, D. D., Frost, G. J., and Trainer, M.: Reduced emissions of CO<sub>2</sub>, NO<sub>x</sub>,  
476 and SO<sub>2</sub> from US power plants owing to switch from coal to natural gas with combined cycle  
477 technology, *Earth's Future*, 2, 75-82, 10.1002/2013EF000196, 2014.

478 Drosoglou, T., Bais, A. F., Zyrichidou, I., Kouremeti, N., Poupkou, A., Liora, N., Giannaros, C.,  
479 Koukouli, M. E., Balis, D., and Melas, D.: Comparisons of ground-based tropospheric NO<sub>2</sub>  
480 MAX-DOAS measurements to satellite observations with the aid of an air quality model over the  
481 Thessaloniki area, Greece, *Atmos. Chem. Phys.*, 17, 5829-5849, 10.5194/acp-17-5829-2017,  
482 2017.

483 Drosoglou, T., Koukouli, M. E., Kouremeti, N., Bais, A. F., Zyrichidou, I., Balis, D., Xu, J., and  
484 Li, A.: MAX-DOAS NO<sub>2</sub> observations over Guangzhou, China; ground-based and satellite  
485 comparisons, *Atmos. Meas. Tech.*, 11, 2239-2255, 10.5194/amt-11-2239-2018, 2018.

486 EPA: PROFILE OF VERSION 1 OF THE 2014 NATIONAL EMISSIONS INVENTORY, U.S.  
487 Environmental Protection Agency, 2017.

488 Air Pollutant Emissions Trends Data: [https://www.epa.gov/air-emissions-inventories/air-](https://www.epa.gov/air-emissions-inventories/air-pollutant-emissions-trends-data)  
489 [pollutant-emissions-trends-data](https://www.epa.gov/air-emissions-inventories/air-pollutant-emissions-trends-data), 2018.

490 Fisher, J. A., Jacob, D. J., Travis, K. R., Kim, P. S., Marais, E. A., Chan Miller, C., Yu, K., Zhu,  
491 L., Yantosca, R. M., and Sulprizio, M. P.: Organic nitrate chemistry and its implications for  
492 nitrogen budgets in an isoprene-and monoterpene-rich atmosphere: constraints from aircraft  
493 (SEAC<sup>4</sup>RS) and ground-based (SOAS) observations in the Southeast US, *Atmos. Chem. Phys.*,  
494 16, 5969-5991, 10.5194/acp-16-5969-2016, 2016.

495 Georgoulias, A. K., van der A, R. J., Stammes, P., Boersma, K. F., and Eskes, H. J.: Trends and  
496 trend reversal detection in 2 decades of tropospheric NO<sub>2</sub> satellite observations, *Atmos. Chem.*  
497 *Phys.*, 19, 6269-6294, 10.5194/acp-19-6269-2019, 2019.

498 Greenberg, N., Carel, R. S., Derazne, E., Bibi, H., Shpriz, M., Tzur, D., and Portnov, B. A.:  
499 Different effects of long-term exposures to SO<sub>2</sub> and NO<sub>2</sub> air pollutants on asthma severity in  
500 young adults, *J. Toxicol. Environ. Health, A*, 79, 342-351, 10.1080/15287394.2016.1153548,  
501 2016.

502 Greenberg, N., Carel, R. S., Derazne, E., Tikitsky, A., Tzur, D., and Portnov, B. A.: Modeling  
503 long-term effects attributed to nitrogen dioxide (NO<sub>2</sub>) and sulfur dioxide (SO<sub>2</sub>) exposure on  
504 asthma morbidity in a nationwide cohort in Israel, *J. Toxicol. Environ. Health, A*, 80, 326-337,  
505 10.1080/15287394.2017.1313800, 2017.

- 506 Gu, D., Wang, Y., Smeltzer, C., and Liu, Z.: Reduction in NO<sub>x</sub> emission trends over China:  
507 Regional and seasonal variations, *Environ. Sci. Technol.*, 47, 12912-12919, 10.1021/es401727e,  
508 2013.
- 509 Gu, D., Wang, Y., Smeltzer, C., and Boersma, K. F.: Anthropogenic emissions of NO<sub>x</sub> over  
510 China: Reconciling the difference of inverse modeling results using GOME-2 and OMI  
511 measurements, *J. Geophys. Res.-Atmos.*, 119, 7732-7740, 10.1002/2014JD021644, 2014.
- 512 Gu, D., Wang, Y., Yin, R., Zhang, Y., and Smeltzer, C.: Inverse modelling of NO<sub>x</sub> emissions over  
513 eastern China: uncertainties due to chemical non-linearity, *Atmos. Meas. Tech.*, 9, 5193-5201,  
514 10.5194/amt-9-5193-2016, 2016.
- 515 Guenther, A. B., Jiang, X., Heald, C. L., Sakulyanontvittaya, T., Duhl, T., Emmons, L. K., and  
516 Wang, X.: The Model of Emissions of Gases and Aerosols from Nature version 2.1  
517 (MEGAN2.1): an extended and updated framework for modeling biogenic emissions, *Geosci.  
518 Model Dev.*, 5, 1471-1492, 10.5194/gmd-5-1471-2012, 2012.
- 519 Hassler, B., McDonald, B. C., Frost, G. J., Borbon, A., Carslaw, D. C., Civerolo, K., Granier, C.,  
520 Monks, P. S., Monks, S., and Parrish, D. D.: Analysis of long-term observations of NO<sub>x</sub> and CO  
521 in megacities and application to constraining emissions inventories, *Geophys. Res. Lett.*, 43,  
522 9920-9930, 10.1002/2016GL069894, 2016.
- 523 Heinrich, J., Thiering, E., Rzehak, P., Krämer, U., Hochadel, M., Rauchfuss, K. M., Gehring, U.,  
524 and Wichmann, H.-E.: Long-term exposure to NO<sub>2</sub> and PM<sub>10</sub> and all-cause and cause-specific  
525 mortality in a prospective cohort of women, *Occup. Environ. Med.*, 70, 179-186, 10.1136/oemed-  
526 2012-100876, 2013.
- 527 Jiang, Z., McDonald, B. C., Worden, H., Worden, J. R., Miyazaki, K., Qu, Z., Henze, D. K.,  
528 Jones, D. B. A., Arellano, A. F., and Fischer, E. V.: Unexpected slowdown of US pollutant  
529 emission reduction in the past decade, *Proc. Natl. Acad. Sci. U.S.A.*, 201801191,  
530 10.1073/pnas.1801191115, 2018.
- 531 Kampa, M., and Castanas, E.: Human health effects of air pollution, *Environ. Pollut.*, 151, 362-  
532 367, 10.1016/j.envpol.2007.06.012, 2008.
- 533 Keabian, P. L., Herndon, S. C., and Freedman, A.: Detection of nitrogen dioxide by cavity  
534 attenuated phase shift spectroscopy, *Anal. Chem.*, 77, 724-728, 10.1021/ac048715y, 2005.
- 535 Koo, J.-H., Wang, Y., Kurosu, T. P., Chance, K., Rozanov, A., Richter, A., Oltmans, S. J.,  
536 Thompson, A. M., Hair, J. W., and Fenn, M. A.: Characteristics of tropospheric ozone depletion  
537 events in the Arctic spring: analysis of the ARCTAS, ARCPAC, and ARCIONS measurements  
538 and satellite BrO observations, *Atmos. Chem. Phys.*, 12, 9909-9922, 10.5194/acp-12-9909-2012,  
539 2012.
- 540 Krotkov, N. A., Lamsal, L. N., Celarier, E. A., Swartz, W. H., Marchenko, S. V., Bucsela, E. J.,  
541 Chan, K. L., Wenig, M., and Zara, M.: The version 3 OMI NO<sub>2</sub> standard product, *Atmos. Meas.  
542 Tech.*, 10, 3133-3149, 10.5194/amt-10-3133-2017, 2017.
- 543 Lamsal, L. N., Martin, R. V., Padmanabhan, A., Van Donkelaar, A., Zhang, Q., Sioris, C. E.,  
544 Chance, K., Kurosu, T. P., and Newchurch, M. J.: Application of satellite observations for timely

545 updates to global anthropogenic NO<sub>x</sub> emission inventories, *Geophys. Res. Lett.*, 38,  
546 10.1029/2010GL046476, 2011.

547 Lamsal, L. N., Duncan, B. N., Yoshida, Y., Krotkov, N. A., Pickering, K. E., Streets, D. G., and  
548 Lu, Z.: US NO<sub>2</sub> trends (2005–2013): EPA Air Quality System (AQS) data versus improved  
549 observations from the Ozone Monitoring Instrument (OMI), *Atmos. Environ.*, 110, 130-143,  
550 10.1016/j.atmosenv.2015.03.055, 2015.

551 Laughner, J. L., Zhu, Q., and Cohen, R. C.: The Berkeley High Resolution Tropospheric NO<sub>2</sub>  
552 product, *Earth System Science Data*, 10, 2069-2095, 10.5194/essd-10-2069-2018, 2018.

553 Li, J., Mao, J., Fiore, A. M., Cohen, R. C., Crouse, J. D., Teng, A. P., Wennberg, P. O., Lee, B.  
554 H., Lopez-Hilfiker, F. D., and Thornton, J. A.: Decadal changes in summertime reactive oxidized  
555 nitrogen and surface ozone over the Southeast United States, *Atmos. Chem. Phys.*, 18, 2341-  
556 2361, 10.5194/acp-18-2341-2018, 2018.

557 Li, J., Wang, Y., and Qu, H.: Dependence of summertime surface ozone on NO<sub>x</sub> and VOC  
558 emissions over the United States: Peak time and value, *Geophys. Res. Lett.*, 46, 3540-3550,  
559 10.1029/2018GL081823, 2019.

560 Liu, Z., Wang, Y., Vrekoussis, M., Richter, A., Wittrock, F., Burrows, J. P., Shao, M., Chang, C.  
561 C., Liu, S. C., and Wang, H.: Exploring the missing source of glyoxal (CHOCHO) over China,  
562 *Geophys. Res. Lett.*, 39, 10.1029/2012GL051645, 2012.

563 Liu, Z., Wang, Y., Costabile, F., Amoroso, A., Zhao, C., Huey, L. G., Stickel, R., Liao, J., and  
564 Zhu, T.: Evidence of aerosols as a media for rapid daytime HONO production over China,  
565 *Environ. Sci. Technol.*, 48, 14386-14391, 10.1021/es504163z, 2014.

566 Luo, C., Wang, Y., and Koshak, W. J.: Development of a self-consistent lightning NO<sub>x</sub>  
567 simulation in large-scale 3-D models, *J. Geophys. Res.-Atmos.*, 122, 3141-3154,  
568 10.1002/2016JD026225, 2017.

569 McDonald, B., McKeen, S., Cui, Y. Y., Ahmadov, R., Kim, S.-W., Frost, G. J., Pollack, I.,  
570 Peischl, J., Ryerson, T. B., and Holloway, J.: Modeling Ozone in the Eastern US using a Fuel-  
571 Based Mobile Source Emissions Inventory, *Environ. Sci. Technol.*, 10.1021/acs.est.8b00778,  
572 2018.

573 Miyazaki, K., Eskes, H., Sudo, K., Boersma, K. F., Bowman, K., and Kanaya, Y.: Decadal  
574 changes in global surface NO<sub>x</sub> emissions from multi-constituent satellite data assimilation,  
575 *Atmos. Chem. Phys.*, 17, 807-837, 10.5194/acp-17-807-2017, 2017.

576 Myhre, G., Shindell, D., Bréon, F.-M., Collins, W., Fuglestedt, J., Huang, J., Koch, D.,  
577 Lamarque, J.-F., Lee, D., Mendoza, B., Nakajima, T., Robock, A., Stephens, G., Takemura, T.,  
578 and Zhang, H.: Anthropogenic and natural radiative forcing, in: *Climate change 2013: The*  
579 *Physical Science Basis. Contribution of Working Group I to the Fifth Assessment Report of the*  
580 *Intergovernmental Panel on Climate Change*, Cambridge University Press, Cambridge, United  
581 Kingdom and New York, NY, USA, 659-740, 2013.

582 Pandey, J. S., Kumar, R., and Devotta, S.: Health risks of NO<sub>2</sub>, SPM and SO<sub>2</sub> in Delhi (India),  
583 *Atmos. Environ.*, 39, 6868-6874, 10.1016/j.atmosenv.2005.08.004, 2005.

584 Price, C., and Rind, D.: A simple lightning parameterization for calculating global lightning  
585 distributions, *J. Geophys. Res.-Atmos.*, 97, 9919-9933, 10.1029/92JD00719, 1992.

586 Russell, A. R., Valin, L. C., and Cohen, R. C.: Trends in OMI NO<sub>2</sub> observations over the United  
587 States: effects of emission control technology and the economic recession, *Atmos. Chem. Phys.*,  
588 12, 12197-12209, 10.5194/acp-12-12197-2012, 2012.

589 Seinfeld, J. H., and Pandis, S. N.: *Atmospheric chemistry and physics: from air pollution to*  
590 *climate change*, John Wiley & Sons, Inc, Hoboken, New Jersey, 2016.

591 Silvern, R. F., Jacob, D. J., Mickley, L. J., Sulprizio, M. P., Travis, K. R., Marais, E. A., Cohen,  
592 R. C., Laughner, J. L., Choi, S., Joiner, J., and Lamsal, L. N.: Using satellite observations of  
593 tropospheric NO<sub>2</sub> columns to infer long-term trends in US NO<sub>x</sub> emissions: the importance of  
594 accounting for the free tropospheric NO<sub>2</sub> background, *Atmos. Chem. Phys.*, 19, 8863-8878,  
595 10.5194/acp-19-8863-2019, 2019.

596 Singh, A., and Agrawal, M.: Acid rain and its ecological consequences, *J. Environ. Biol.*, 29, 15,  
597 2007.

598 Tong, D., Lamsal, L., Pan, L., Ding, C., Kim, H., Lee, P., Chai, T., Pickering, K. E., and Stajner,  
599 I.: Long-term NO<sub>x</sub> trends over large cities in the United States during the great recession:  
600 Comparison of satellite retrievals, ground observations, and emission inventories, *Atmos.*  
601 *Environ.*, 107, 70-84, 10.1016/j.atmosenv.2015.01.035, 2015.

602 Valin, L. C., Russell, A. R., Hudman, R. C., and Cohen, R. C.: Effects of model resolution on the  
603 interpretation of satellite NO<sub>2</sub> observations, *Atmos. Chem. Phys.*, 11, 11647-11655, 10.5194/acp-  
604 11-11647-2011, 2011.

605 Wang, Y., Choi, Y., Zeng, T., Davis, D., Buhr, M., Huey, L. G., and Neff, W.: Assessing the  
606 photochemical impact of snow NO<sub>x</sub> emissions over Antarctica during ANTCI 2003, *Atmos.*  
607 *Environ.*, 41, 3944-3958, 10.1016/j.atmosenv.2007.01.056, 2007.

608 Wang, Y., Beirle, S., Lampel, J., Koukouli, M., De Smedt, I., Theys, N., Ang, L., Wu, D., Xie, P.,  
609 and Liu, C.: Validation of OMI, GOME-2A and GOME-2B tropospheric NO<sub>2</sub>, SO<sub>2</sub> and HCHO  
610 products using MAX-DOAS observations from 2011 to 2014 in Wuxi, China: investigation of the  
611 effects of priori profiles and aerosols on the satellite products, *Atmos. Chem. Phys.*, 17, 5007,  
612 10.5194/acp-17-5007-2017, 2017.

613 Weinmayr, G., Romeo, E., De Sario, M., Weiland, S. K., and Forastiere, F.: Short-term effects of  
614 PM<sub>10</sub> and NO<sub>2</sub> on respiratory health among children with asthma or asthma-like symptoms: a  
615 systematic review and meta-analysis, *Environ. Health Perspect.*, 118, 449-457,  
616 10.1289/ehp.0900844, 2009.

617 Xing, J., Pleim, J., Mathur, R., Pouliot, G., Hogrefe, C., Gan, C. M., and Wei, C.: Historical  
618 gaseous and primary aerosol emissions in the United States from 1990 to 2010, *Atmos. Chem.*  
619 *Phys.*, 13, 7531-7549, 10.5194/acp-13-7531-2013, 2013.

620 Yang, Q., Wang, Y., Zhao, C., Liu, Z., Gustafson Jr, W. I., and Shao, M.: NO<sub>x</sub> emission reduction  
621 and its effects on ozone during the 2008 Olympic Games, *Environ. Sci. Technol.*, 45, 6404-6410,  
622 10.1021/es200675v, 2011.



- 623 Yienger, J. J., and Levy, H.: Empirical model of global soil-biogenic NO<sub>x</sub> emissions, *J. Geophys.*  
624 *Res.-Atmos.*, 100, 11447-11464, 10.1029/95JD00370, 1995.
- 625 Yu, K., Jacob, D. J., Fisher, J. A., Kim, P. S., Marais, E. A., Miller, C. C., Travis, K. R., Zhu, L.,  
626 Yantosca, R. M., and Sulprizio, M. P.: Sensitivity to grid resolution in the ability of a chemical  
627 transport model to simulate observed oxidant chemistry under high-isoprene conditions, *Atmos.*  
628 *Chem. Phys.*, 16, 4369-4378, 10.5194/acp-16-4369-2016, 2016.
- 629 Zara, M., Boersma, K. F., De Smedt, I., Richter, A., Peters, E., Van Geffen, J. H. G. M., Beirle,  
630 S., Wagner, T., Van Roozendaal, M., and Marchenko, S.: Improved slant column density retrieval  
631 of nitrogen dioxide and formaldehyde for OMI and GOME-2A from QA4ECV: intercomparison,  
632 uncertainty characterization, and trends, *Meas. Tech. Discuss.*, 1-47, 10.5194/amt-11-4033-2018,  
633 2018.
- 634 Zhang, R., Wang, Y., He, Q., Chen, L., Zhang, Y., Qu, H., Smeltzer, C., Li, J., Alvarado, L., and  
635 Vrekoussis, M.: Enhanced trans-Himalaya pollution transport to the Tibetan Plateau by cut-off  
636 low systems, *Atmos. Chem. Phys.*, 17, 3083-3095, 10.5194/acp-17-3083-2017, 2017.
- 637 Zhang, R., Wang, Y., Smeltzer, C., Qu, H., Koshak, W., and Boersma, K. F.: Comparing OMI-  
638 based and EPA AQS in situ NO<sub>2</sub> trends: towards understanding surface NO<sub>x</sub> emission changes,  
639 *Atmos. Meas. Tech.*, 11, 3955-3967, 10.5194/amt-11-3955-2018, 2018.
- 640 Zhang, Y., and Wang, Y.: Climate-driven ground-level ozone extreme in the fall over the  
641 Southeast United States, *Proc. Natl. Acad. Sci. U.S.A.*, 113, 10025-10030,  
642 10.1073/pnas.1602563113, 2016.
- 643 Zhao, C., and Wang, Y.: Assimilated inversion of NO<sub>x</sub> emissions over east Asia using OMI NO<sub>2</sub>  
644 column measurements, *Geophys. Res. Lett.*, 36, 10.1029/2008GL037123, 2009.
- 645 Zhao, C., Wang, Y., Choi, Y., and Zeng, T.: Summertime impact of convective transport and  
646 lightning NO<sub>x</sub> production over North America: modeling dependence on meteorological  
647 simulations, *Atmos. Chem. Phys.*, 9, 4315-4327, 10.5194/acp-9-4315-2009, 2009a.
- 648 Zhao, C., Wang, Y., and Zeng, T.: East China plains: A “basin” of ozone pollution, *Environ. Sci.*  
649 *Technol.*, 43, 1911-1915, 10.1021/es8027764, 2009b.
- 650 Zhao, C., Wang, Y., Yang, Q., Fu, R., Cunnold, D., and Choi, Y.: Impact of East Asian summer  
651 monsoon on the air quality over China: View from space, *J. Geophys. Res.-Atmos.*, 115,  
652 10.1029/2009JD012745, 2010.

653

**Table 1.** Summary of trends of satellite NO<sub>2</sub> TVCD products, NO<sub>2</sub> surface measurements, and EPA anthropogenic NO<sub>x</sub> emissions during from different studies

| Studies                                            | Datasets                                                           | Period 1 <sup>1</sup> |                                        | Period 2    |                           | Period 3    |                              | Slowdown ratio <sup>3</sup> |
|----------------------------------------------------|--------------------------------------------------------------------|-----------------------|----------------------------------------|-------------|---------------------------|-------------|------------------------------|-----------------------------|
|                                                    |                                                                    | Time                  | Trend (yr <sup>-1</sup> ) <sup>2</sup> | Time        | Trend (yr <sup>-1</sup> ) | Time        | Trend (yr <sup>-1</sup> )    |                             |
| This study for CONUS<br>“urban” sites <sup>4</sup> | GOME-2B <sup>5</sup> (36 × 36 km <sup>2</sup> )                    |                       |                                        |             |                           | 2013 - 2017 | <b>-8.2 ± 3.0%</b>           |                             |
|                                                    | SCIAMACHY (36 × 36 km <sup>2</sup> )                               | 2003 – 2011           | <b>-6.3 ± 1.1%</b>                     |             |                           |             |                              |                             |
|                                                    | OMI-NASA (36 × 36 km <sup>2</sup> )                                | 2005 – 2011           | <b>-8.6 ± 1.2%</b>                     |             |                           | 2011 – 2016 | <b>-6.1 ± 3.6%</b>           | <b>-29%</b> <sup>2</sup>    |
|                                                    | OMI-BEHR (36 × 36 km <sup>2</sup> )                                | 2005 – 2011           | <b>-8.2 ± 1.3%</b>                     |             |                           | 2011 – 2016 | <b>-4.4 ± 1.6%</b>           | <b>-46%</b>                 |
|                                                    | OMI-QA4ECV (36 × 36 km <sup>2</sup> )                              | 2005 – 2011           | <b>-7.7 ± 1.4%</b>                     |             |                           | 2011 - 2017 | <b>-4.2 ± 0.5%</b>           | <b>-46%</b>                 |
|                                                    | Updated EPA NO <sub>x</sub> emissions <sup>6</sup>                 | 2003 – 2011           | <b>-6.5 ± 0.8%</b>                     |             |                           | 2011 - 2017 | <b>-5.1 ± 0.3%</b>           | <b>-22%</b>                 |
| This study for AQS<br>“urban” sites                | GOME-2B (36 × 36 km <sup>2</sup> )                                 |                       |                                        |             |                           | 2013 - 2017 | <b>-10.2 ± 2.9%</b>          |                             |
|                                                    | SCIAMACHY (36 × 36 km <sup>2</sup> )                               | 2003 - 2011           | <b>-7.6 ± 1.1%</b>                     |             |                           |             |                              |                             |
|                                                    | OMI-NASA (36 × 36 km <sup>2</sup> )                                | 2005 - 2011           | <b>-9.0 ± 0.8%</b>                     |             |                           | 2011 – 2016 | <b>-7.2 ± 3.8%</b>           | <b>-20%</b>                 |
|                                                    | OMI-BEHR (36 × 36 km <sup>2</sup> )                                | 2005 - 2011           | <b>-8.9 ± 0.3%</b>                     |             |                           | 2011 – 2016 | <b>-6.2 ± 2.6%</b>           | <b>-30%</b>                 |
|                                                    | OMI-QA4ECV (36 × 36 km <sup>2</sup> )                              | 2005 - 2011           | <b>-9.0 ± 0.8%</b>                     |             |                           | 2011 - 2017 | <b>-5.4 ± 0.9%</b>           | <b>-40%</b>                 |
|                                                    | NO <sub>2</sub> surface VMR <sup>7</sup>                           | 2003 - 2011           | <b>-6.5 ± 1.2%</b>                     |             |                           | 2011 - 2017 | <b>-5.9 ± 0.8%</b>           | <b>-9%</b>                  |
| (Russell et al., 2012) <sup>8</sup>                | BEHR v2.1 NO <sub>2</sub> TVCD (0.05°×0.05°)                       | 2005 - 2007           | -6 ± 5% ( <b>-6.2%</b> ) <sup>9</sup>  | 2007 - 2009 | -8 ± 5% ( <b>-8.4%</b> )  | 2009 - 2011 | -3 ± 4% ( <b>-3.0%</b> )     | <b>-52%</b>                 |
|                                                    | Updated EPA NO <sub>x</sub> emissions                              |                       | <b>-6.0%</b>                           |             | <b>-10.0%</b>             |             | <b>-2.4%</b>                 | <b>-60%</b>                 |
| (Tong et al., 2015) <sup>10</sup>                  | NASA v2.1 NO <sub>2</sub> TVCD (pixels < 50 × 24 km <sup>2</sup> ) |                       | -7.3% ( <b>-7.6%</b> )                 |             | -9.2% ( <b>-11.4%</b> )   |             | -2.8% ( <b>-4.4%</b> )       | <b>-42%</b>                 |
|                                                    | BEHR v2.1 NO <sub>2</sub> TVCD (pixels < 50 × 24 km <sup>2</sup> ) | 2005 - 2007           | -8.9% ( <b>-9.3%</b> )                 | 2008 - 2009 | -9.1% ( <b>-11.8%</b> )   | 2010 - 2012 | -3.6% ( <b>-6.0%</b> )       | <b>-35%</b>                 |
|                                                    | NO <sub>2</sub> surface VMR                                        |                       | -6.0% ( <b>-6.2%</b> )                 |             | -10.8% ( <b>-13.2%</b> )  |             | -3.4% ( <b>-5.4%</b> )       | <b>-13%</b>                 |
|                                                    | Updated EPA NO <sub>x</sub> emissions                              |                       | <b>-6.0%</b>                           |             | <b>-10.0%</b>             |             | <b>-3.4%</b>                 | <b>-43%</b>                 |
| (Lamsal et al., 2015) <sup>11</sup>                | NASA v2.1 NO <sub>2</sub> TVCD (0.1°×0.1°)                         |                       | -4.8 ± 1.9% ( <b>-5.1%</b> )           |             |                           |             | -1.2 ± 1.2% ( <b>-1.2%</b> ) | <b>-76%</b>                 |
|                                                    | NO <sub>2</sub> surface VMR                                        | 2005 - 2008           | -3.7 ± 1.5% ( <b>-3.8%</b> )           |             |                           | 2010 - 2013 | -2.1 ± 1.4% ( <b>-2.1%</b> ) | <b>-45%</b>                 |
|                                                    | Updated EPA NO <sub>x</sub> emissions                              |                       | <b>-6.4%</b>                           |             |                           |             | <b>-4.0%</b>                 | <b>-38%</b>                 |
| (Jiang et al., 2018) <sup>11</sup>                 | NASA v3 NO <sub>2</sub> TVCD (0.5°×0.667°)                         |                       | -10.2 ± 1.8% ( <b>-9.8%</b> )          |             |                           |             | -3.2 ± 1.6% ( <b>-3.2%</b> ) | <b>-67%</b>                 |
|                                                    | QA4ECV v2 NO <sub>2</sub> TVCD (0.5°×0.667°)                       |                       | -9.6 ± 1.7% ( <b>-9.3%</b> )           |             |                           |             | -2.6 ± 1.8% ( <b>-2.6%</b> ) | <b>-72%</b>                 |
|                                                    | BEHR v2.1 NO <sub>2</sub> TVCD (0.5°×0.667°)                       | 2005 - 2009           | -8.5 ± 1.8% ( <b>-8.2%</b> )           |             |                           | 2011-2015   | -2.1 ± 1.6% ( <b>-2.1%</b> ) | <b>-74%</b>                 |
|                                                    | NO <sub>2</sub> surface VMR                                        |                       | -6.6 ± 1.4% ( <b>-6.4%</b> )           |             |                           |             | -2.6 ± 1.5% ( <b>-2.6%</b> ) | <b>-59%</b>                 |
|                                                    | Updated EPA NO <sub>x</sub> emissions                              |                       | <b>-7.8%</b>                           |             |                           |             | <b>-5.0%</b>                 | <b>-36%</b>                 |

655

<sup>1</sup> Since different studies used different time division methods, we list the period of each study in the table.

656

<sup>2</sup> Trends are based on an exponential model ( $E(y) = E_0 \times r^{y-y_0}$ : “y” denotes year and “y<sub>0</sub>” denotes the initial year; “E(y)” denotes the value at year “y” and “E<sub>0</sub>” denotes the value at the initial year; r-1 is the relative trend).

657

<sup>3</sup> Slowdown ratios = Trend in “period 3” / Trend in “period 1” – 1.

658

<sup>4</sup> Trends in our study are calculated based on the national seasonal trends shown in Table 3.

659

<sup>5</sup> The information on satellite products used in this study is summarized in Table S2.

660

<sup>6</sup> We updated EPA anthropogenic NO<sub>x</sub> emissions with the newest Continuous Emission Monitoring Systems (CEMS) datasets. Figure S24 shows the comparison between our updated and original EPA anthropogenic NO<sub>x</sub> emissions (EPA, 2018).

661

<sup>7</sup> Denote the averaged trends of 13:00 and 10:00 LT based on the values in Table 3.

662 <sup>8</sup> The study used NO<sub>2</sub> TVCD from urban and power plant grid cells across the U.S.

663 <sup>9</sup> Since previous studies used linear models to calculate trends and the results are sensitive to their calculation methods and the selection of initial years, we recalculate the trends based on the above exponential model, which makes all the results  
664 consistent. Our results are those bold numbers inside the parentheses, while the numbers in normal fonts are from the original publications.

665 <sup>10</sup> The study uses NO<sub>2</sub> TVCD and surface concentrations from Los Angeles, Dallas, Houston, Atlanta, Philadelphia, Washington, D.C., New York, and Boston.

666 <sup>11</sup> The two studies used the EPA Air Quality System (AQS) NO<sub>2</sub> surface measurements and coincident satellite NO<sub>2</sub> TVCD data over the U.S.

667 **Table 2.** Properties of urban and rural regions in July 2011

| type                     | Surface area fraction <sup>1</sup> | Anthropogenic NO <sub>x</sub> emissions<br>(× 10 <sup>10</sup> molecules cm <sup>-2</sup> s <sup>-1</sup> ) | β at 13:00 – 14:00 LT                     | γ at 13:00 – 14:00 LT                    | β at 10:00 – 11:00 LT                     | γ at 10:00 – 11:00 LT                    |
|--------------------------|------------------------------------|-------------------------------------------------------------------------------------------------------------|-------------------------------------------|------------------------------------------|-------------------------------------------|------------------------------------------|
| Urban/CONUS <sup>2</sup> | 17.3%                              | 29.9                                                                                                        | <del>2.53</del> ± <del>1.00</del> .9      | <del>1.54</del> ± 0.43                   | <del>2.64</del> ± 1.98                    | <del>1.65</del> ± 1.20                   |
| Rural/CONUS              | 82.7%                              | 2.7                                                                                                         | <del>16.98</del> .1 ± <del>16.48</del> .7 | <del>8.53</del> .1 ± <del>11.73</del> .9 | <del>12.25</del> .9 ± <del>14.08</del> .0 | <del>6.42</del> .8 ± <del>11.65</del> .8 |
| Urban/AQS                | 87.7%                              | 71.0                                                                                                        | <del>1.65</del> ± 0.87                    | 1.2 ± 0.4                                | 1.7 ± 1.10                                | 1.3 ± 0.65                               |
| Rural/AQS                | 12.3%                              | 5.7                                                                                                         | <del>8.75</del> .0 ± <del>9.92</del> .0   | <del>5.22</del> .5 ± <del>8.81</del> .3  | <del>5.44</del> .3 ± <del>15.13</del> .2  | <del>3.82</del> .7 ± <del>11.72</del> .6 |

668 <sup>1</sup>“Fraction” denotes the percentages of “urban” or “rural” data points for the whole CONUS or all AQS sites.

669 <sup>2</sup>“Urban-CONUS” denote CONUS “urban” grid cells; “Urban-AQS” denote AQS “urban” site grid cells.

670

671

672  
673**Table 3.** Summary of national trends of updated EPA anthropogenic NO<sub>x</sub> emissions, AQS NO<sub>2</sub> surface concentrations at 13:00 – 14:00 and 10:00 – 11:00 LT, and satellite NO<sub>2</sub> TVCD products for 4 seasons during different periods<sup>1</sup>

|                                             |             | Spring       |              | Summer       |             | Autumn        |              | Winter        |               |
|---------------------------------------------|-------------|--------------|--------------|--------------|-------------|---------------|--------------|---------------|---------------|
|                                             |             | AQS site     | CONUS        | AQS site     | CONUS       | AQS site      | CONUS        | AQS site      | CONUS         |
| AQS NO <sub>2</sub> VMR<br>at 13:00 -14:00  | 2003 – 2011 | -7.3 ± 1.4%  |              | -7.4 ± 0.9%  |             | -6.7 ± 1.8%   |              | -5.2 ± 0.8%   |               |
|                                             | 2011 – 2017 | -5.3 ± 1.6%  |              | -6.4 ± 1.2%  |             | -7.3 ± 2.5%   |              | -6.0 ± 2.8%   |               |
| AQS NO <sub>2</sub> VMR<br>at 10:00 – 11:00 | 2003 – 2011 | -7.1 ± 1.6%  |              | -7.6 ± 1.5%  |             | -6.2 ± 2.2%   |              | -4.4 ± 1.6%   |               |
|                                             | 2011 – 2017 | -4.4 ± 1.4%  |              | -6.1 ± 1.8%  |             | -6.3 ± 2.5%   |              | -5.2 ± 2.4%   |               |
| SCIAMACHY                                   | 2003 – 2011 | -8.8 ± 3.4%  | -6.9 ± 1.1%  | -8.2 ± 1.6%  | -5.2 ± 1.2% | -6.8 ± 2.4%   | -5.6 ± 2.1%  | -6.4 ± 7.4%   | -7.5 ± 5.5%   |
|                                             | 2011 – 2017 |              |              |              |             |               |              |               |               |
| GOME2B                                      | 2003 – 2011 |              |              |              |             |               |              |               |               |
|                                             | 2013 – 2017 | -10.2 ± 7.8% | -8.3 ± 16.9% | -6.4 ± 14.0% | -5.3 ± 4.0% | -10.5 ± 41.6% | -6.9 ± 13.2% | -13.6 ± 15.1% | -12.3 ± 78.9% |
| OMI-QA4ECV                                  | 2005 – 2011 | -9.3 ± 5.6%  | -8.3 ± 4.6%  | -8.3 ± 2.4%  | -5.9 ± 5.2% | -10.0 ± 4.2%  | -7.4 ± 2.4%  | -8.3 ± 2.1%   | -9.3 ± 5.2%   |
|                                             | 2011 – 2017 | -5.3 ± 6.0%  | -4.3 ± 6.5%  | -4.2 ± 3.0%  | -4.9 ± 9.2% | -6.0 ± 1.8%   | -3.8 ± 1.8%  | -6.1 ± 25.6%  | -3.8 ± 3.5%   |
| OMI-NASA                                    | 2005 – 2011 | -9.4 ± 5.0%  | -9.6 ± 5.3%  | -9.4 ± 2.8%  | -7.1 ± 2.9% | -9.4 ± 3.2%   | -8.1 ± 2.8%  | -7.8 ± 3.6%   | -9.5 ± 16.6%  |
|                                             | 2011 – 2016 | -4.4 ± 18.9% | -3.8 ± 7.5%  | -5.7 ± 6.7%  | -4.5 ± 5.3% | -6.0 ± 3.1%   | -4.6 ± 3.9%  | -12.8 ± 7.8%  | -11.4 ± 6.6%  |
| OMI-BEHR                                    | 2005 – 2011 | -9.1 ± 5.3%  | -8.9 ± 5.8%  | -8.7 ± 2.4%  | -6.4 ± 3.2% | -9.2 ± 3.2%   | -8.0 ± 3.1%  | -8.5 ± 10.6%  | -9.4 ± 23.0%  |
|                                             | 2011 – 2016 | -3.8 ± 4.4%  | -3.0 ± 4.0%  | -5.4 ± 7.0%  | -3.9 ± 6.6% | -5.6 ± 13.2%  | -4.1 ± 14.0% | -9.9 ± 5.2%   | -6.7 ± 5.9%   |
| EPA                                         | 2003 – 2011 |              |              |              |             | -6.5 ± 0.8%   |              |               |               |
|                                             | 2011 – 2017 |              |              |              |             | -5.1 ± 0.3%   |              |               |               |

674

<sup>1</sup> We calculate trends by using the exponential model described in Table 1.

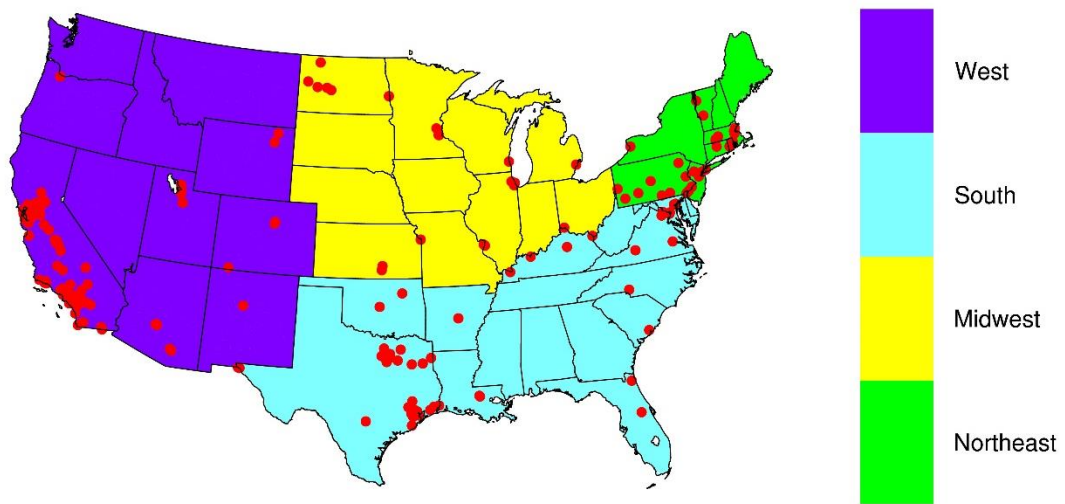

675  
676 Figure 1. Region definitions and locations of NO<sub>2</sub> surface observation sites used in this study.

677

678

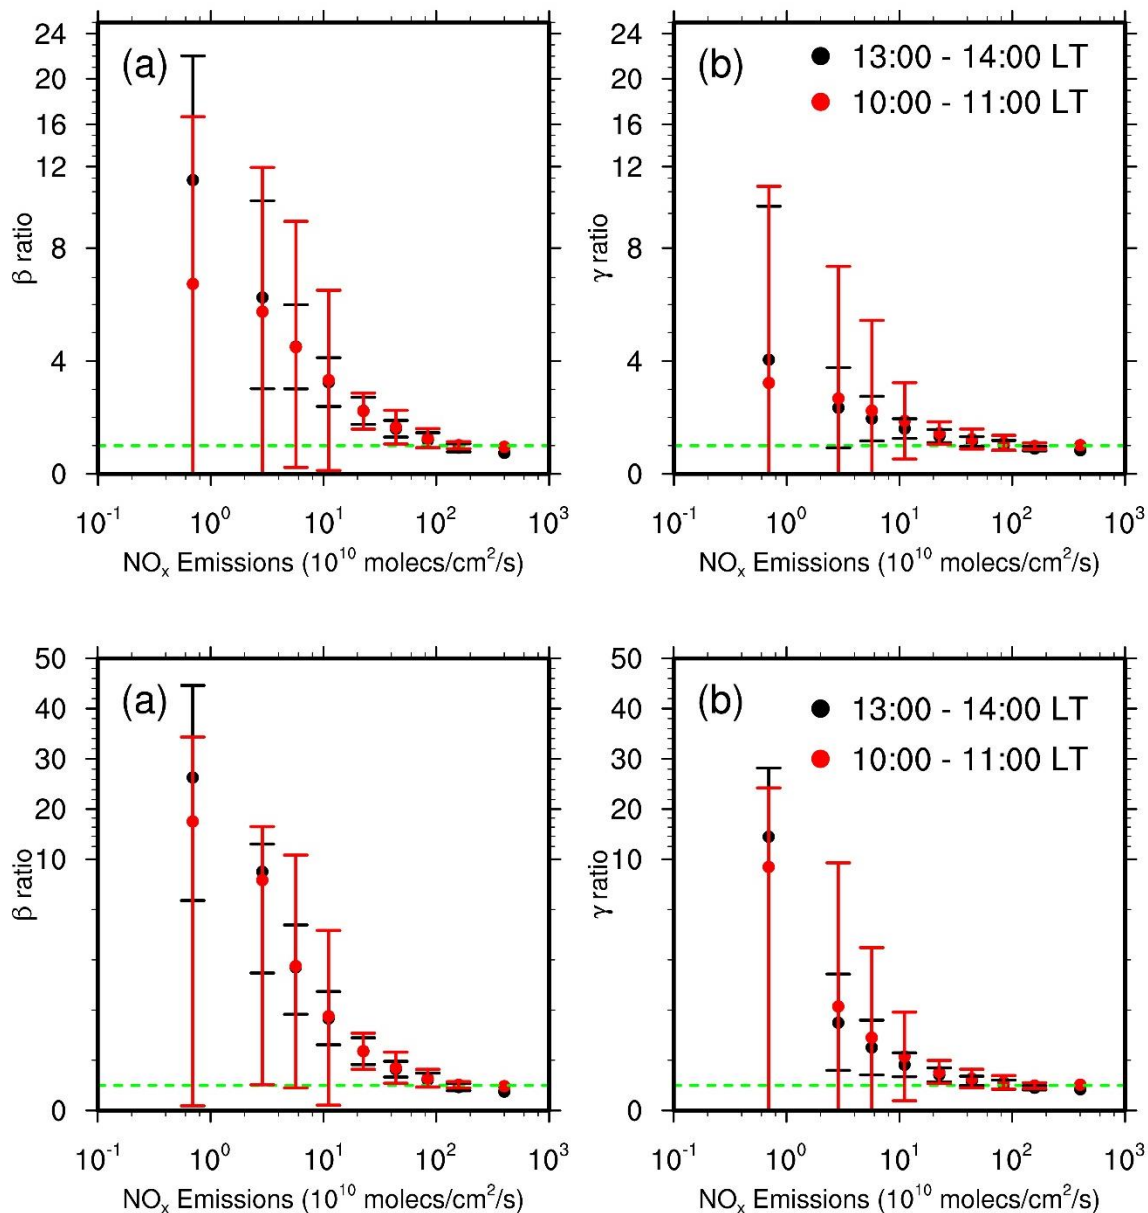

679

680

681 Figure 2. Distributions of  $\beta$  (panel a) and  $\gamma$  (panel b) ratios as a function of anthropogenic  $\text{NO}_x$   
 682 emissions on weekdays for July 2011 over the CONUS. “13:00 – 14:00 LT” is for OMI, and  
 683 “10:00 – 11:00” LT is for SCIAMACHY and GOME-2A/2B. The data are binned into nine  
 684 groups based on anthropogenic  $\text{NO}_x$  emissions:  $E \in (0, 2^1), [2^1, 2^2), [2^2, 2^3), [2^3, 2^4), [2^4, 2^5), [2^5,$   
 685  $2^6), [2^6, 2^7), [2^7, 2^8), [2^8, 2^9) \times 10^{10} \text{ molecules cm}^{-2} \text{ s}^{-1}$ . Here,  $(0, 2^1)$  denotes  $0 < \text{emissions} < 2^1$ ,  
 686 and  $[2^1, 2^2)$  denotes  $2^1 \leq \text{emissions} < 2^2$ , similar to other intervals. The green dashed line denotes  
 687 a value of 1. Error bars denote standard deviations.

688

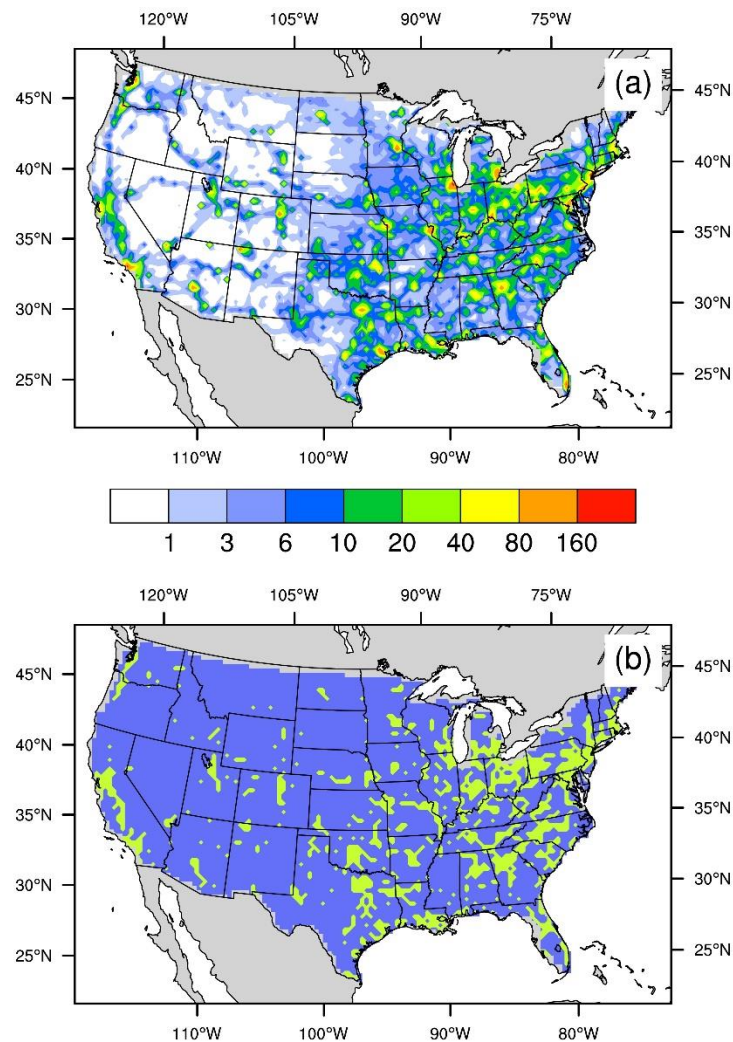

689  
 690 Figure 3. Spatial distributions of (a) anthropogenic NO<sub>x</sub> emissions (unit: 10<sup>10</sup> molecules cm<sup>-2</sup> s<sup>-1</sup>)  
 691 and (b) “urban” regions satisfying our selection criteria. In (b), light green and blue denote the  
 692 resulting urban and rural regions, respectively.

693



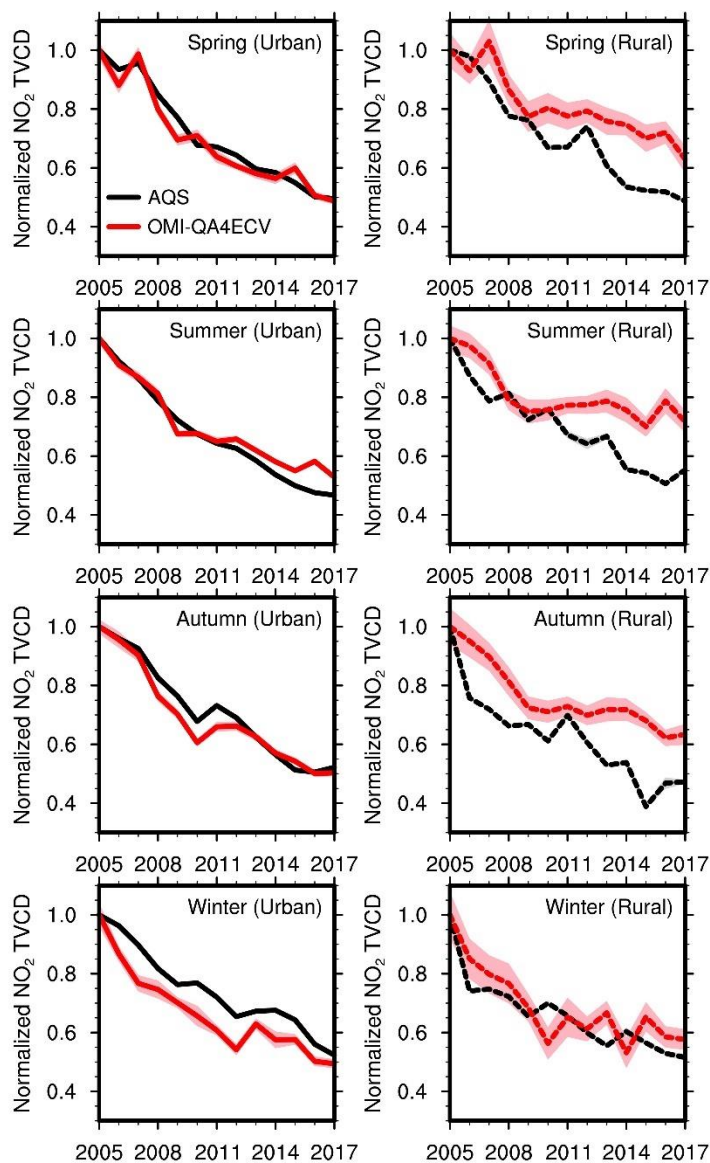

695 Figure 4. Relative annual variations of AQS  $\text{NO}_2$  surface concentrations and coincident OMI-  
 696 QA4ECV  $\text{NO}_2$  TVCD in each season from 2005 – 2017 for urban (left panel) and rural (right  
 697 panel) regions. The observation data are scaled by the corresponding 2005 values. Black and red  
 698 lines denote AQS surface observations and OMI-QA4ECV  $\text{NO}_2$  TVCDs, respectively. Shading in  
 699 a lighter color is added to show the standard deviation of the results; when uncertainty is small  
 700 due in part to a large number of data points, shading area may not show up.  
 701

702

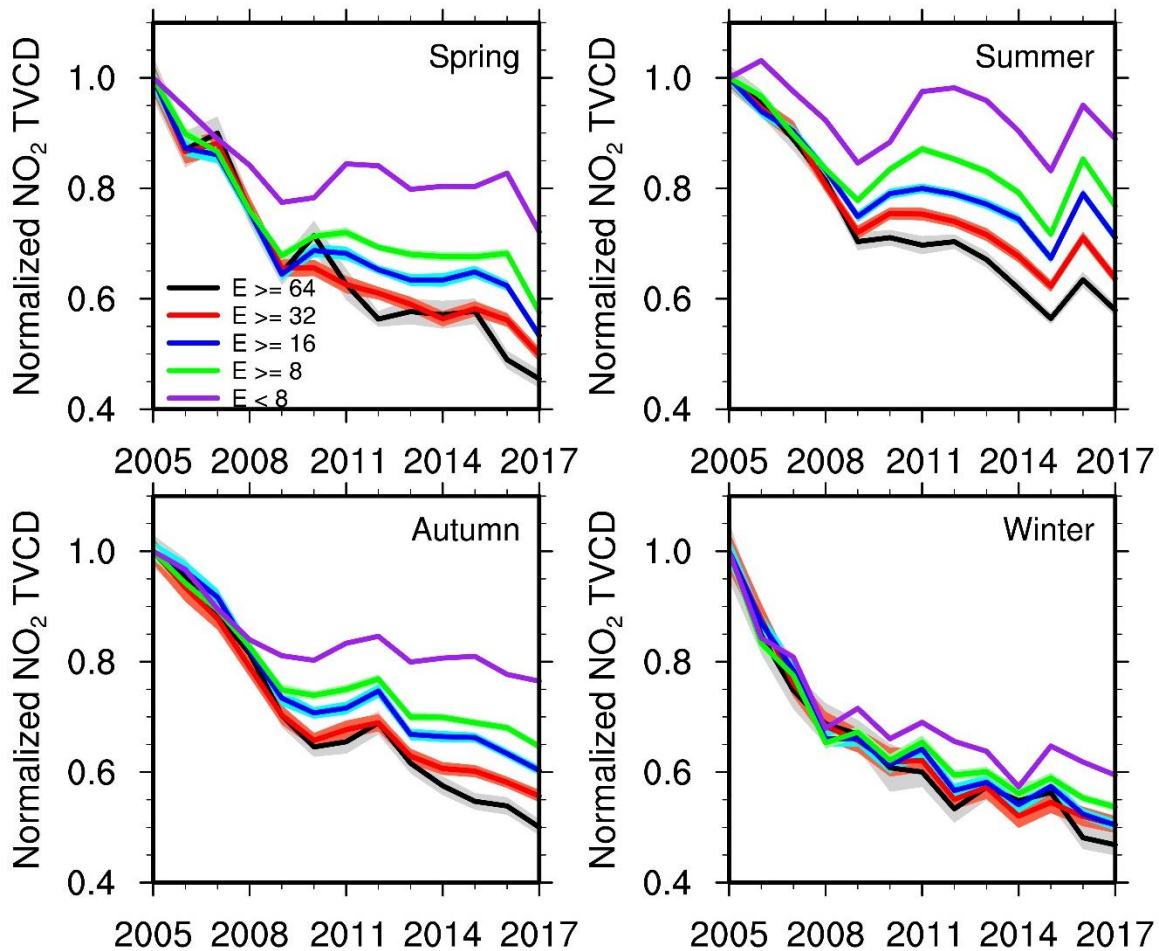

703

704

705

706

707

708

709

710

711

712

Figure 5. Relative annual variations of OMI-QA4ECV NO<sub>2</sub> TVCD for different anthropogenic NO<sub>x</sub>-emission groups based on NEI2011 in each season from 2005 – 2017. “E >= 64” denotes grid cells with anthropogenic NO<sub>x</sub> emissions over  $64 \times 10^{10}$  molecules cm<sup>-2</sup> s<sup>-1</sup>. “E >= 32” denotes grid cells with anthropogenic NO<sub>x</sub> emissions equal to or larger than  $32 \times 10^{10}$  molecules cm<sup>-2</sup> s<sup>-1</sup> but less than  $64 \times 10^{10}$  molecules cm<sup>-2</sup> s<sup>-1</sup>. “E >= 16” and “E >= 8” have similar meanings as “E >= 32”. “E < 8” denotes grid cells with anthropogenic NO<sub>x</sub> emissions less than  $8 \times 10^{10}$  molecules cm<sup>-2</sup> s<sup>-1</sup>. Shading in a lighter color is added to show the standard deviation of the results; when uncertainty is small due in part to a large number of data points, shading area may not show up.

713

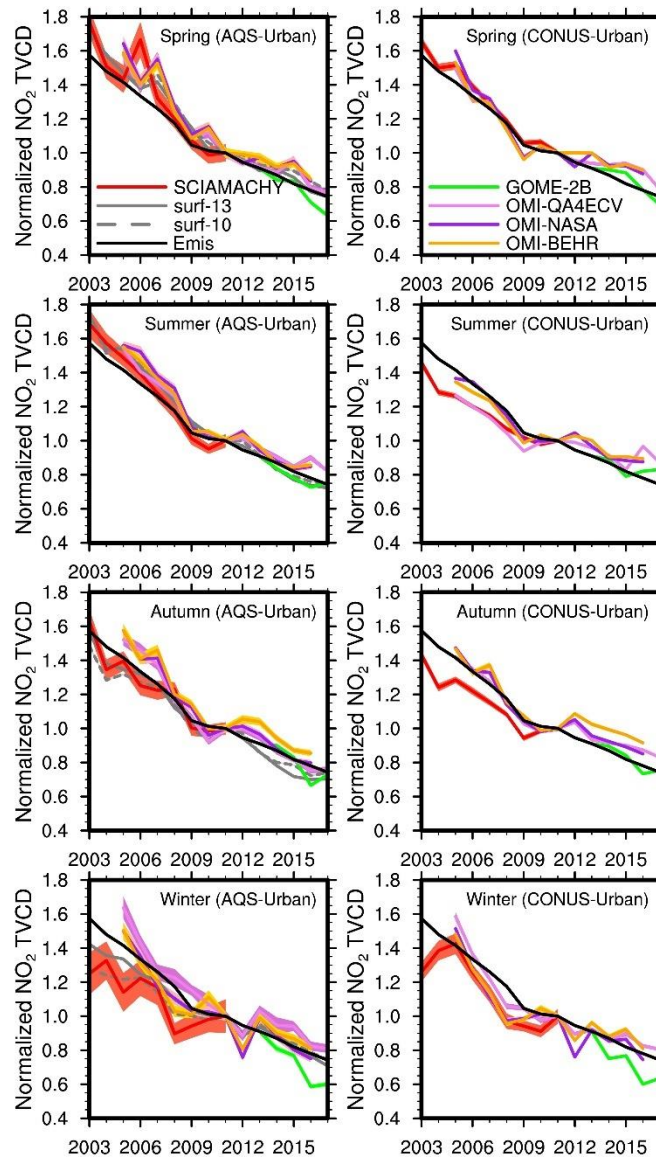

715  
 716 Figure 6. Relative variations of AQS  $\text{NO}_2$  surface measurements at 13:00-14:00 and 10:00-11:00  
 717 LT, updated EPA anthropogenic  $\text{NO}_x$  emissions, and satellite  $\text{NO}_2$  TVCD data over the AQS  
 718 urban sites (left column) and the CONUS urban regions (right column) for 4 seasons. AQS  $\text{NO}_2$   
 719 surface measurements are not included in the right column. All datasets are scaled by their  
 720 corresponding values in 2011 except for GOME-2B. For GOME-2B, we firstly normalized the  
 721 values in each season to the corresponding 2013 values and plotted the relative changes from the  
 722 2013 EPA point of each season to make the GOME-2B relative variations comparable to the  
 723 other datasets. Shading in a lighter color is added to show the standard deviation of the results;  
 724 when uncertainty is small due in part to a large number of data points, shading area may not show  
 725 up.

726

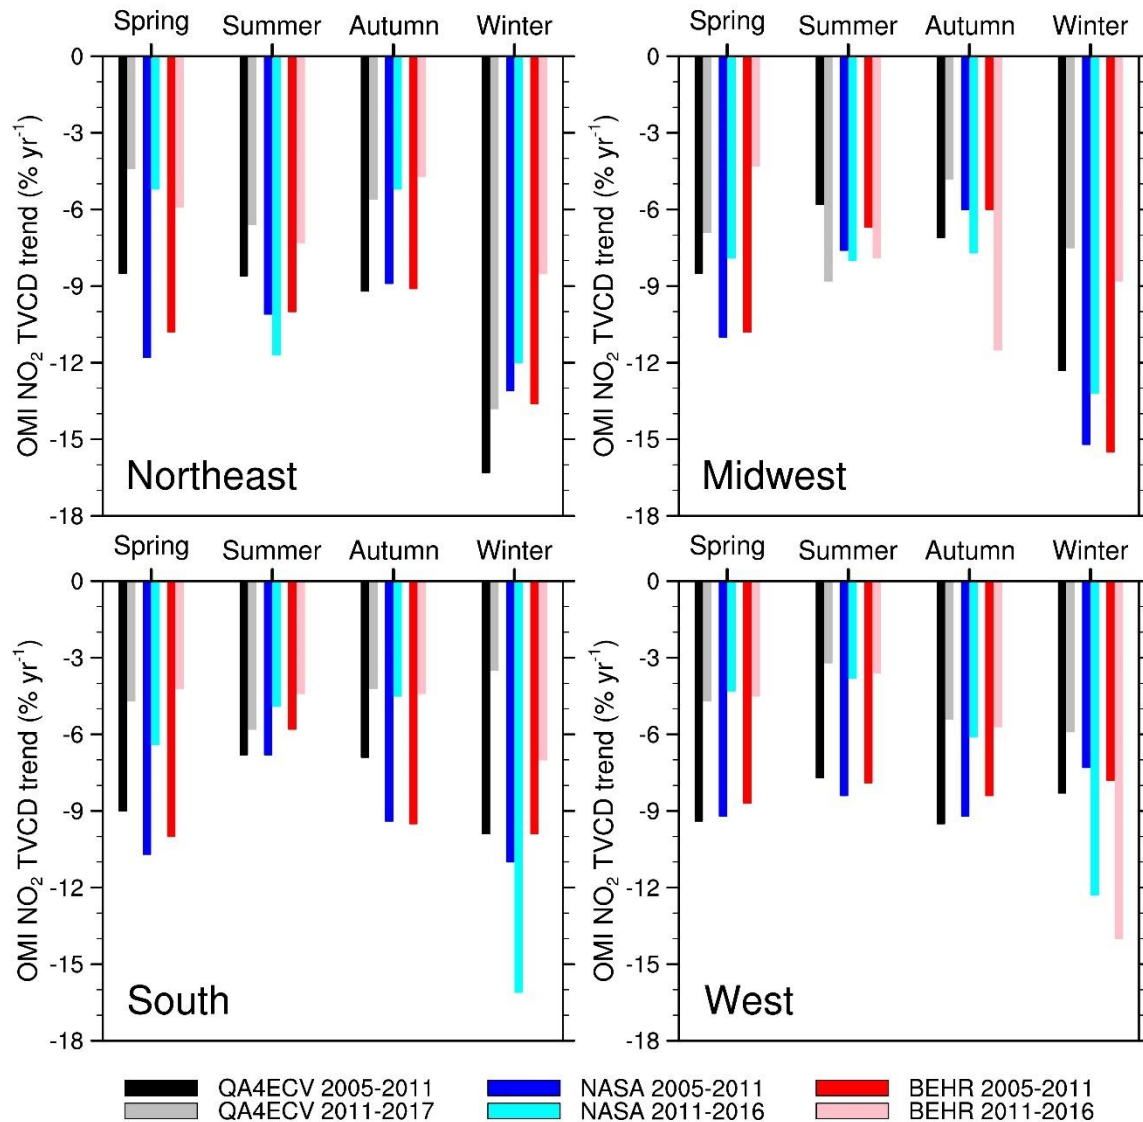

728

729

730

731

732

733

734

735

Figure 7. Pre- and post-2011 OMI NO<sub>2</sub> TVCD trends for 4 seasons in the urban regions of Northeast, Midwest, South, and West. Black bars denote OMI-QA4ECV NO<sub>2</sub> TVCD trends from 2005 – 2011; gray bars denote the corresponding trends during 2011 – 2017. Blue bars denote OMI-NASA trends from 2005 – 2011; cyan bars denote NASA-OMI trends from 2011 – 2016. Red bars denote BEHR-OMI trends from 2005 – 2011; pink bars denote OMI-BEHR trends from 2011 – 2016.

1

SUPPORTING INFORMATION AVAILABLE

2

3

4

5

**Inferring the anthropogenic NO<sub>x</sub> emission trend over the United States during 2003 - 2017 from satellite observations: Was there a flattening of the emission trend after the Great Recession?**

6

Jianfeng Li<sup>1</sup>, Yuhang Wang<sup>1\*</sup>

7

<sup>1</sup>School of Earth and Atmospheric Sciences, Georgia Institute of Technology, Atlanta, Georgia, USA

8

9

\* *Correspondence to* Yuhang Wang (yuhang.wang@eas.gatech.edu)

10

11

## 12 **Figure Captions**

13 Figure S1. Annual variation of  $\text{NO}_3^-$  wet deposition fluxes for each season from 2003 – 2017. The  
14 fluxes were scaled by the corresponding values in 2003. Shaded regions denote standard  
15 deviations. Monthly  $\text{NO}_3^-$  wet deposition observations are obtained from  
16 <https://nadp.slh.wisc.edu/data/NTN/ntnAllsites.aspx> (last access, September 29, 2019).

17 Figure S24. Comparison between original EPA anthropogenic  $\text{NO}_x$  emissions and updated EPA  
18 anthropogenic  $\text{NO}_x$  emissions with the newest Continuous Emission Monitoring Systems  
19 (CEMS) measurements.

20 Figure S32. Daily OMI  $\text{NO}_2$  TVCDs for July 2011 (a) and 2012 (b) in Atlanta ( $33.755^\circ \text{N}$ ,  $84.39^\circ$   
21  $\text{W}$ ). Black circles are weekday values, and red circles are weekend values. We find significant  
22 daily variations of  $\text{NO}_2$  TVCD from (a) and (b). The number of available measurements in July  
23 2011 is much less than July 2012. We find clear larger  $\text{NO}_2$  TVCD values on weekdays than on  
24 weekends in July 2011, but the difference between weekday and weekend TVCDs in July 2012  
25 are not so obvious.

26 Figure S43. Hourly averaged ratios of FEM (a) and CAPS (b) to FRM  $\text{NO}_2$  measurements in each  
27 season, respectively. The FEM/FRM ratios are computed from coincident FRM and FEM  
28 measurements from 2013 – 2015 at 4 sites. The CAPS/FRM ratios are calculated based on  
29 coincident CAPS and FRM data from 2015 – 2016 at 3 sites.

30 Figure S54. Annual variations of AQS  $\text{NO}_2$  surface concentrations at different hours on weekdays  
31 in spring (a, b), summer (c, d), autumn (e, f), and winter (g, h). Left panels show absolute  $\text{NO}_2$   
32 concentrations, and right panels are their relative variations normalized to 2011. To conduct  
33 reliable and consistent comparisons, we only used monitoring sites satisfying the seasonal  $RCI <$   
34  $50\%$  and continuity criteria on weekdays from 2003 – 2017.

35 Figure S6. Distributions of (a) NO<sub>2</sub> TVCD fraction that is in the boundary layer (< 2810 m) at  
 36 13:00 – 14:00, (b) NO<sub>2</sub> TVCD fraction in the boundary layer (< 1290 m) at 10:00 – 11:00, (c) the  
 37 fraction of soil NO<sub>x</sub> emissions in all surface sources (anthropogenic + soil) on weekdays for July  
 38 2011. As the lifetime of NO<sub>2</sub> in the free troposphere (several days ~ 2 weeks) is much longer than  
 39 that in the boundary layer (~ 10 hours), local lightning NO<sub>x</sub> emissions cannot represent NO<sub>2</sub>  
 40 VCDs in the free troposphere. In this study, we apply NO<sub>2</sub> VCD in the free troposphere to  
 41 analyze the impact of lightning NO<sub>x</sub> on the nonlinear relationships between anthropogenic NO<sub>x</sub>  
 42 emissions and NO<sub>2</sub> TVCDs and use lightning NO<sub>x</sub> and NO<sub>2</sub> VCD in the free troposphere  
 43 interchangeably in the following.

44 Figure S7. (a) Distributions of the fractions of surface NO<sub>x</sub> emissions emitted by soil  
 45 (“SoilNO<sub>x</sub>”), the portions of NO<sub>2</sub> TVCDs in the boundary layer (“PBLVCD”), and the fractions  
 46 of NO<sub>2</sub> TVCDs from anthropogenic NO<sub>x</sub> emissions (“AnthroVCD”) as functions of NEI2011  
 47 anthropogenic NO<sub>x</sub> emissions at 13:00 – 14:00 LT on weekdays for July 2011 over the CONUS.

48 The fraction of NO<sub>2</sub> TVCDs from anthropogenic NO<sub>x</sub> emissions is equal to  $\left(1 - \right.$   
 49  $\left. \frac{E_{soil}}{E_{soil}+E_{anthropogenic}} \right) \times \left( \frac{TVCD_{boundary}}{TVCD_{boundary}+TVCD_{free}} \right)$ , where  $E_{soil}$  denotes soil NO<sub>x</sub> emissions,  
 50  $E_{anthropogenic}$  denotes anthropogenic NO<sub>x</sub> emissions,  $TVCD_{boundary}$  denotes NO<sub>2</sub> TVCDs in the  
 51 boundary layer, and  $TVCD_{free}$  denotes NO<sub>2</sub> TVCDs in the free troposphere. The calculated data  
 52 are grouped into 9 bins as in Figure 2. (b) Same as (a), but for 10:00 – 11:00 LT. (c) Distributions  
 53 of  $\beta_{Emis}$ ,  $\gamma_{Emis}$ ,  $\beta$ , and  $\gamma$  as functions of anthropogenic NO<sub>x</sub> emissions at 13:00 – 14:00 LT on  
 54 weekdays for July 2011 over the CONUS.  $\beta$  and  $\gamma$  are the same as Figure 2.  $\beta_{Emis}$  and  $\gamma_{Emis}$  denote  
 55  $\beta$  and  $\gamma$  values when no other factors are taken into consideration except for soil NO<sub>x</sub> emissions,  
 56 anthropogenic NO<sub>x</sub> emissions, and NO<sub>2</sub> in the free troposphere.  $\beta_{Emis} =$

57 
$$\frac{15\% \times \left( \frac{E_{anthropogenic}}{E_{anthropogenic}+E_{soil}} \right) \left( \frac{TVCD_{boundary}}{TVCD_{boundary}+TVCD_{free}} \right)}{15\% \times \left( \frac{E_{anthropogenic}+E_{soil}}{E_{anthropogenic}} \right) \left( \frac{TVCD_{boundary}+TVCD_{free}}{TVCD_{boundary}} \right)}$$

58 and  $\gamma_{Emis} = \frac{15\%}{15\% \times \left( \frac{E_{anthropogenic}}{E_{anthropogenic} + E_{soil}} \right)} = \left( \frac{E_{anthropogenic} + E_{soil}}{E_{anthropogenic}} \right)$ . It is noteworthy that here we  
59 assume no interactions between the boundary layer and the free troposphere, boundary  $NO_x$  are  
60 only related to soil and anthropogenic  $NO_x$  emissions, and lightning  $NO_x$  only affect  $NO_2$  in the  
61 free troposphere. The assumptions are reasonable as the time scale ( $\sim 1$  week) of the interactions  
62 between the boundary layer and the free troposphere are much longer than  $NO_x$  lifetime in the  
63 boundary layer, and in this study, only a small fraction of lightning  $NO_x$  is distributed into the  
64 boundary layer. Therefore,  $\beta_{Emis}$  and  $\gamma_{Emis}$  roughly represent the contributions of background  
65 sources (lightning  $NO_x$  and soil  $NO_x$ ) to  $\beta$  and  $\gamma$  values. The differences between  $\beta$  ( $\gamma$ ) and  $\beta_{Emis}$   
66 ( $\gamma_{Emis}$ ) indicate the contribution of non-emission factors to  $\beta$  ( $\gamma$ ) values, such as chemistry,  
67 transport, and dry and wet depositions. (d) Same as (c), but for 10:00 – 11:00 LT. From this  
68 figure, we find that both background sources (lightning  $NO_x$  + soil  $NO_x$ ) and non-emission  
69 factors are important when considering the nonlinear relationships among  $NO_x$  emissions,  $NO_2$   
70 surface concentrations, and  $NO_2$  TVCDs in low-anthropogenic- $NO_x$  emission regions.

71 Figure S87. Same as Figure 4, but for AQS  $NO_2$  surface concentrations and coincident GOME-  
72 2A  $NO_2$  TVCD data during 2008 – 2016.

73 Figure S98. Relative variations of OMI-QA4ECV  $NO_2$  TVCD data for urban regions (black lines)  
74 and the whole CONUS (red lines) from 2005 – 2017 in 4 seasons.



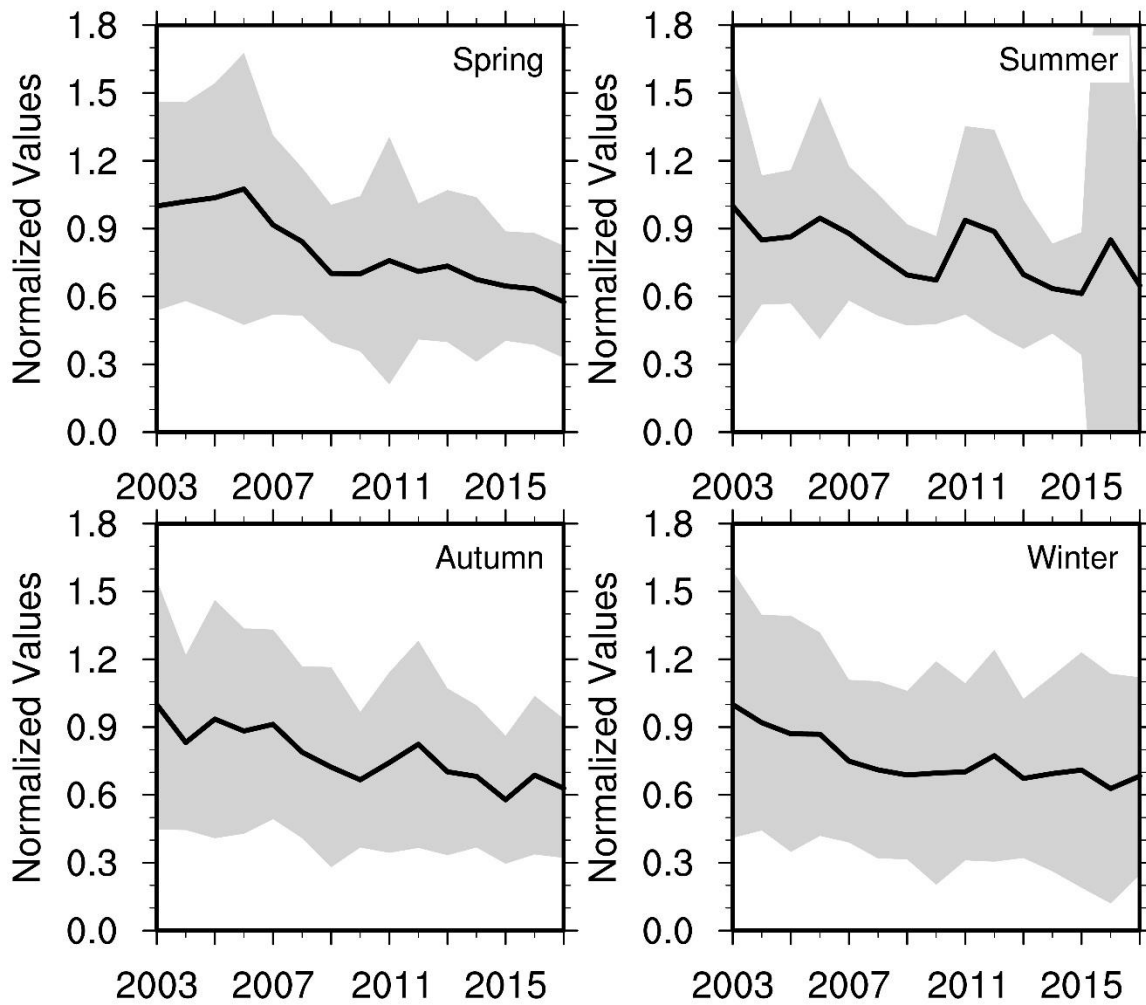

75

76 [Figure S1. Annual variation of NO<sub>3</sub><sup>-</sup> wet deposition fluxes for each season from 2003 – 2017. The](#)  
 77 [fluxes were scaled by the corresponding values in 2003. Shaded regions denote standard](#)  
 78 [deviations. Monthly NO<sub>3</sub><sup>-</sup> wet deposition observations are obtained from](#)  
 79 <https://nadp.slh.wisc.edu/data/NTN/ntnAllsites.aspx> (last access, September 29, 2019).

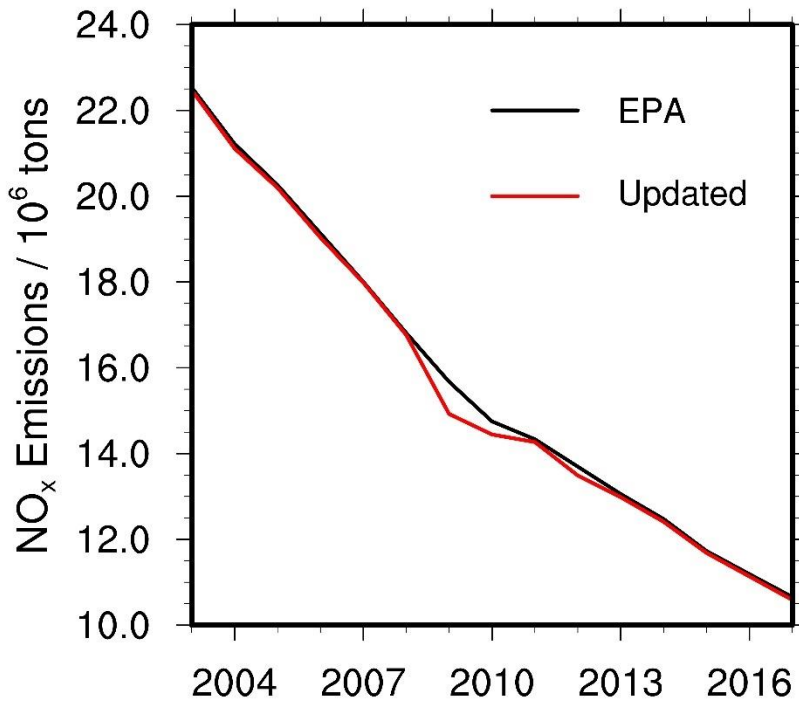

80

81 Figure S24. Comparison between original EPA anthropogenic NO<sub>x</sub> emissions and updated EPA  
82 anthropogenic NO<sub>x</sub> emissions with the newest Continuous Emission Monitoring Systems  
83 (CEMS) measurements.

84

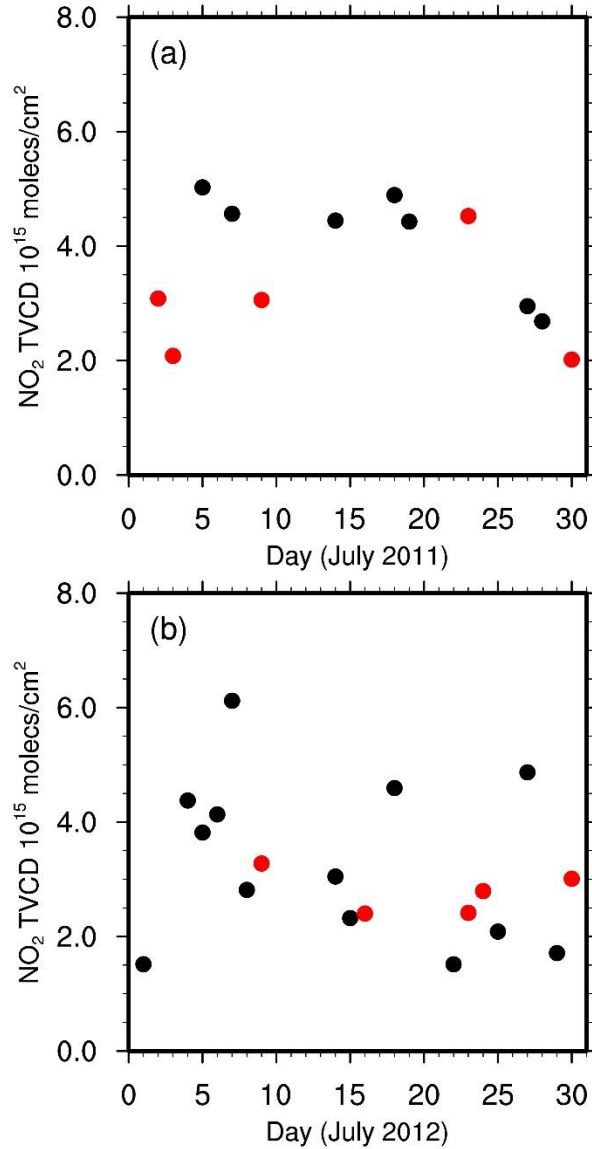

85

86 Figure S32. Daily OMI NO<sub>2</sub> TVCDs for July 2011 (a) and 2012 (b) in Atlanta (33.755° N, 84.39°  
 87 W). Black circles are weekday values, and red circles are weekend values. We find significant  
 88 daily variations of NO<sub>2</sub> TVCD from (a) and (b). The number of available measurements in July  
 89 2011 is much less than July 2012. We find clear larger NO<sub>2</sub> TVCD values on weekdays than on  
 90 weekends in July 2011, but the difference between weekday and weekend TVCDs in July 2012  
 91 are not so obvious.

92

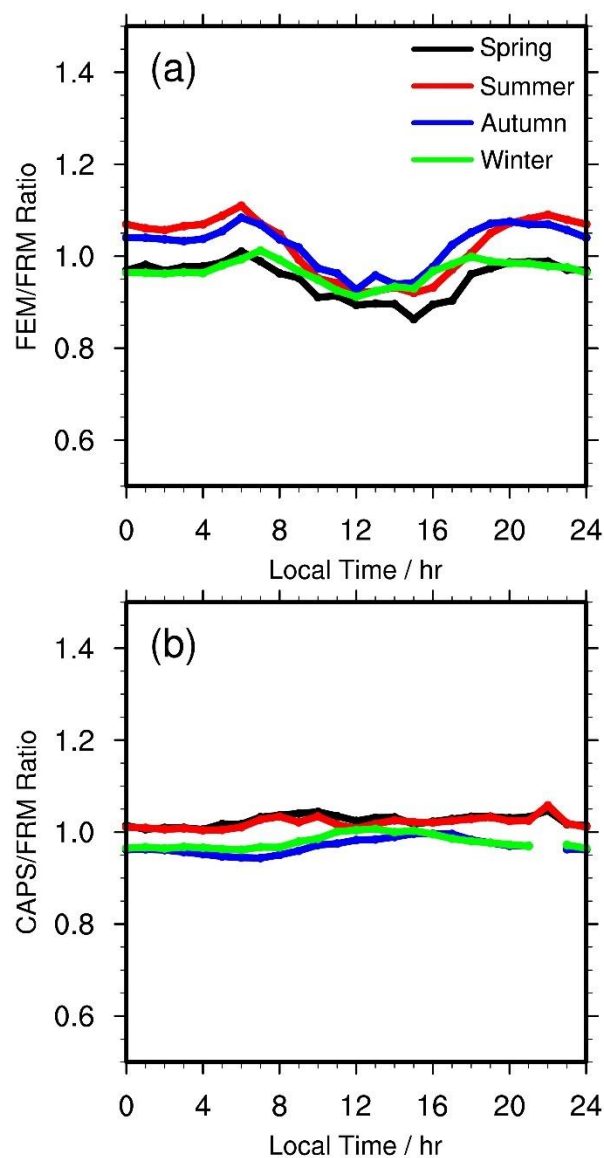

93

94 Figure S43. Hourly averaged ratios of FEM (a) and CAPS (b) to FRM NO<sub>2</sub> measurements in each  
 95 season, respectively. The FEM/FRM ratios are computed from coincident FRM and FEM  
 96 measurements from 2013 – 2015 at 4 sites. The CAPS/FRM ratios are calculated based on  
 97 coincident CAPS and FRM data from 2015 – 2016 at 3 sites.

98

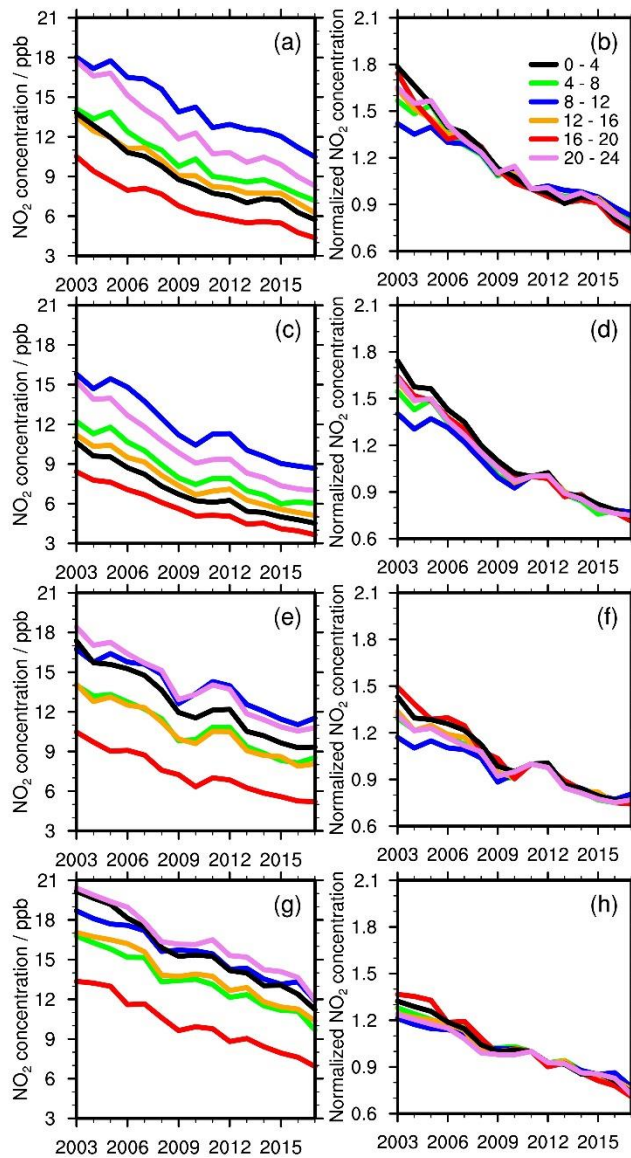

99

100 Figure S54. Annual variations of AQS NO<sub>2</sub> surface concentrations at different hours on weekdays  
 101 in spring (a, b), summer (c, d), autumn (e, f), and winter (g, h). Left panels show absolute NO<sub>2</sub>  
 102 concentrations, and right panels are their relative variations normalized to 2011. To conduct  
 103 reliable and consistent comparisons, we only used monitoring sites satisfying the seasonal *RCI* <  
 104 50% and continuity criteria on weekdays from 2003 – 2017.

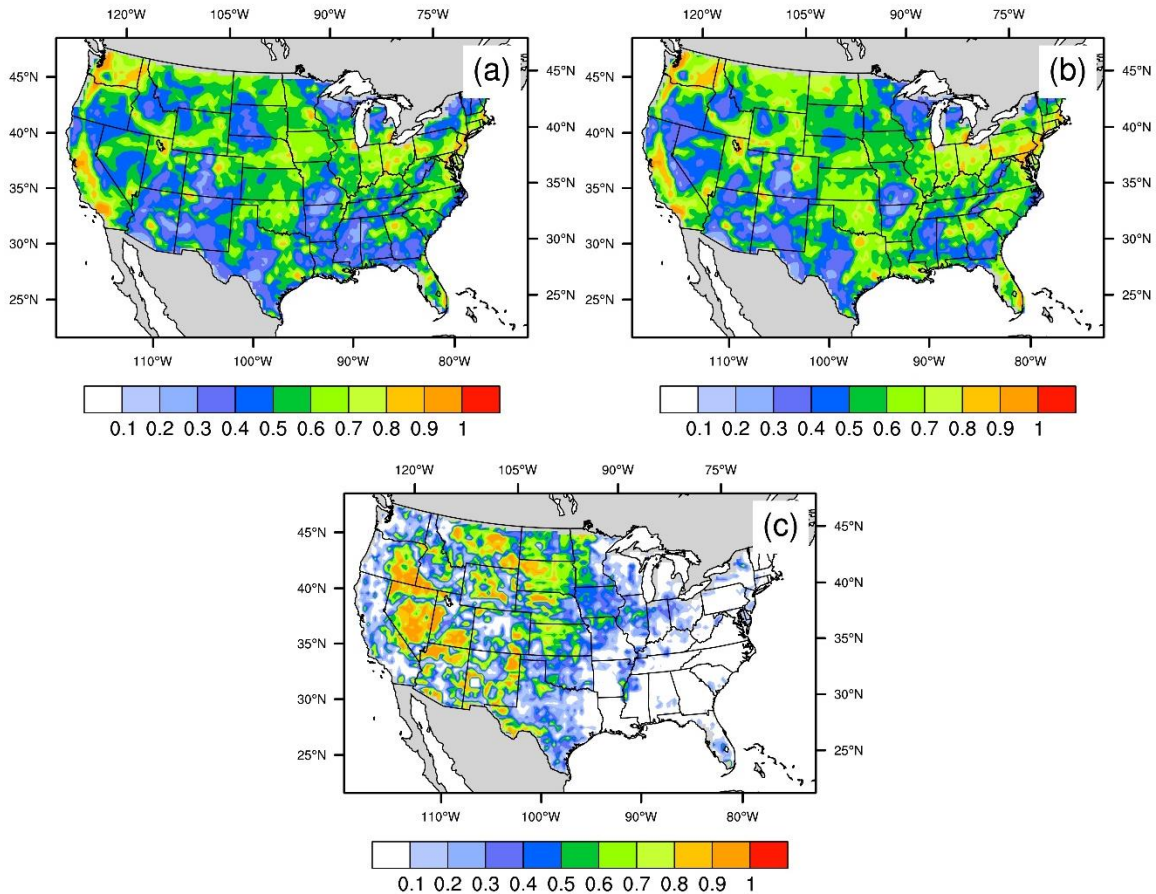

105

106 Figure S6. Distributions of (a) NO<sub>2</sub> TVCD fraction that is in the boundary layer (< 2810 m) at  
 107 13:00 – 14:00, (b) NO<sub>2</sub> TVCD fraction in the boundary layer (< 1290 m) at 10:00 – 11:00, (c) the  
 108 fraction of soil NO<sub>x</sub> emissions in all surface sources (anthropogenic + soil) on weekdays for July  
 109 2011. As the lifetime of NO<sub>2</sub> in the free troposphere (several days ~ 2 weeks) is much longer than  
 110 that in the boundary layer (~ 10 hours), local lightning NO<sub>x</sub> emissions cannot represent NO<sub>2</sub>  
 111 VCDs in the free troposphere. In this study, we apply NO<sub>2</sub> VCD in the free troposphere to  
 112 analyze the impact of lightning NO<sub>x</sub> on the nonlinear relationships between anthropogenic NO<sub>x</sub>  
 113 emissions and NO<sub>2</sub> TVCDs and use lightning NO<sub>x</sub> and NO<sub>2</sub> VCD in the free troposphere  
 114 interchangeably in the following.

115

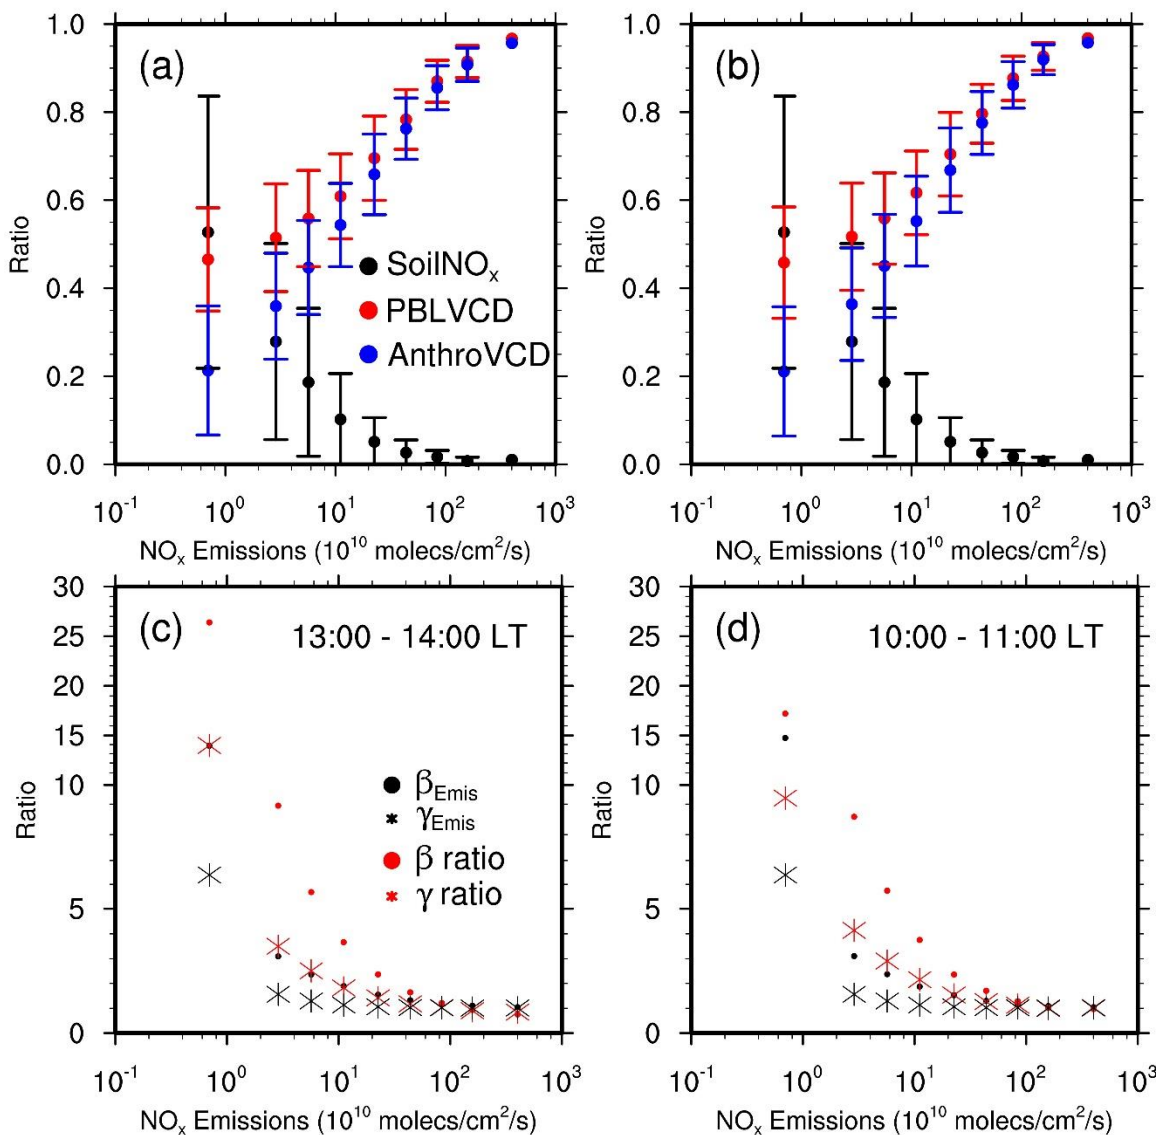

116

117 Figure S7. (a) Distributions of the fractions of surface  $\text{NO}_x$  emissions emitted by soil  
 118 (“SoilNO<sub>x</sub>”), the portions of  $\text{NO}_2$  TVCDs in the boundary layer (“PBLVCD”), and the fractions  
 119 of  $\text{NO}_2$  TVCDs from anthropogenic  $\text{NO}_x$  emissions (“AnthroVCD”) as functions of NEI2011  
 120 anthropogenic  $\text{NO}_x$  emissions at 13:00 – 14:00 LT on weekdays for July 2011 over the CONUS.

121 The fraction of  $\text{NO}_2$  TVCDs from anthropogenic  $\text{NO}_x$  emissions is equal to  $\left(1 -$

122 
$$\frac{E_{\text{soil}}}{E_{\text{soil}} + E_{\text{anthropogenic}}}) \times \left( \frac{\text{TVCD}_{\text{boundary}}}{\text{TVCD}_{\text{boundary}} + \text{TVCD}_{\text{free}}} \right),$$
 where  $E_{\text{soil}}$  denotes soil  $\text{NO}_x$  emissions.

123  $E_{anthropogenic}$  denotes anthropogenic  $\text{NO}_x$  emissions,  $TVCD_{boundary}$  denotes  $\text{NO}_2$  TVCDs in the  
124 boundary layer, and  $TVCD_{free}$  denotes  $\text{NO}_2$  TVCDs in the free troposphere. The calculated data  
125 are grouped into 9 bins as in Figure 2. (b) Same as (a), but for 10:00 – 11:00 LT. (c) Distributions  
126 of  $\beta_{Emis}$ ,  $\gamma_{Emis}$ ,  $\beta$ , and  $\gamma$  as functions of anthropogenic  $\text{NO}_x$  emissions at 13:00 – 14:00 LT on  
127 weekdays for July 2011 over the CONUS.  $\beta$  and  $\gamma$  are the same as Figure 2.  $\beta_{Emis}$  and  $\gamma_{Emis}$  denote  
128  $\beta$  and  $\gamma$  values when no other factors are taken into consideration except for soil  $\text{NO}_x$  emissions,  
129 anthropogenic  $\text{NO}_x$  emissions, and  $\text{NO}_2$  in the free troposphere.  $\beta_{Emis} =$   
130 
$$\frac{15\%}{15\% \times \left( \frac{E_{anthropogenic}}{E_{anthropogenic} + E_{soil}} \right) \left( \frac{TVCD_{boundary}}{TVCD_{boundary} + TVCD_{free}} \right)} = \left( \frac{E_{anthropogenic} + E_{soil}}{E_{anthropogenic}} \right) \left( \frac{TVCD_{boundary} + TVCD_{free}}{TVCD_{boundary}} \right)$$
  
131 and  $\gamma_{Emis} = \frac{15\%}{15\% \times \left( \frac{E_{anthropogenic}}{E_{anthropogenic} + E_{soil}} \right)} = \left( \frac{E_{anthropogenic} + E_{soil}}{E_{anthropogenic}} \right)$ . It is noteworthy that here we  
132 assume no interactions between the boundary layer and the free troposphere, boundary  $\text{NO}_x$  are  
133 only related to soil and anthropogenic  $\text{NO}_x$  emissions, and lightning  $\text{NO}_x$  only affect  $\text{NO}_2$  in the  
134 free troposphere. The assumptions are reasonable as the time scale ( $\sim 1$  week) of the interactions  
135 between the boundary layer and the free troposphere are much longer than  $\text{NO}_x$  lifetime in the  
136 boundary layer, and in this study, only a small fraction of lightning  $\text{NO}_x$  is distributed into the  
137 boundary layer. Therefore,  $\beta_{Emis}$  and  $\gamma_{Emis}$  roughly represent the contributions of background  
138 sources (lightning  $\text{NO}_x$  and soil  $\text{NO}_x$ ) to  $\beta$  and  $\gamma$  values. The differences between  $\beta$  ( $\gamma$ ) and  $\beta_{Emis}$   
139 ( $\gamma_{Emis}$ ) indicate the contribution of non-emission factors to  $\beta$  ( $\gamma$ ) values, such as chemistry,  
140 transport, and dry and wet depositions. (d) Same as (c), but for 10:00 – 11:00 LT. From this  
141 figure, we find that both background sources (lightning  $\text{NO}_x$  + soil  $\text{NO}_x$ ) and non-emission  
142 factors are important when considering the nonlinear relationships among  $\text{NO}_x$  emissions,  $\text{NO}_2$   
143 surface concentrations, and  $\text{NO}_2$  TVCDs in low-anthropogenic- $\text{NO}_x$  emission regions.

144



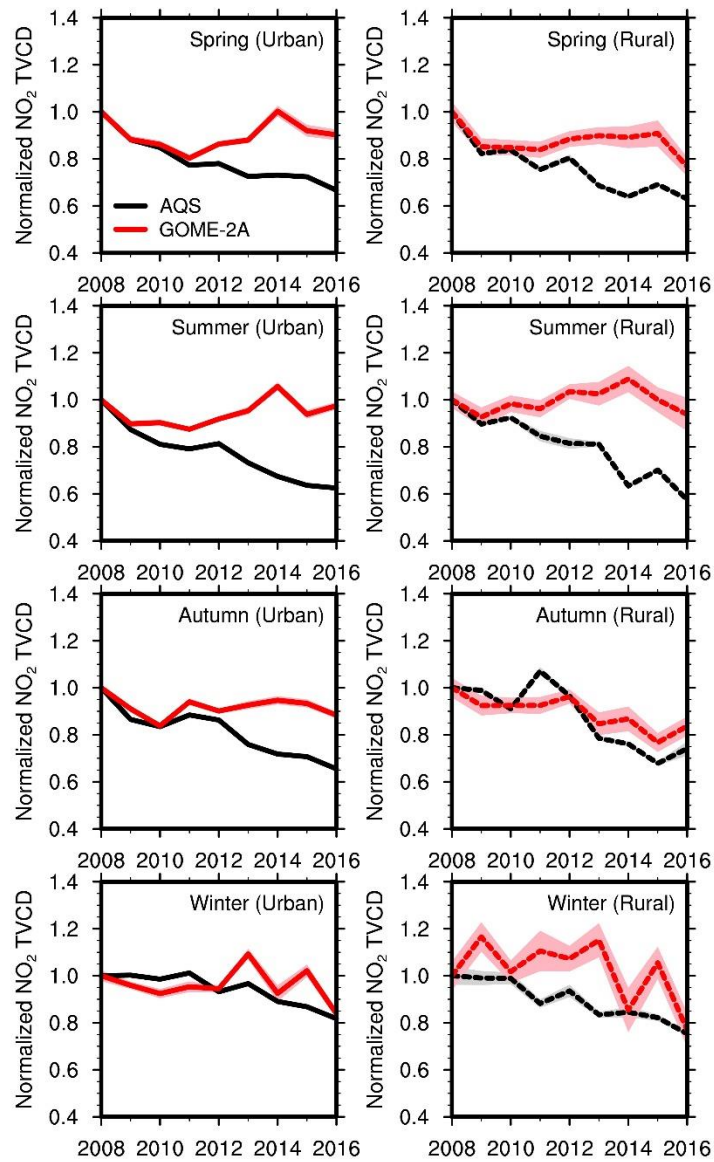

145

146 Figure S85. Same as Figure 4, but for AQS NO<sub>2</sub> surface concentrations and coincident GOME-  
 147 2A NO<sub>2</sub> TVCD data during 2008 – 2016.

148

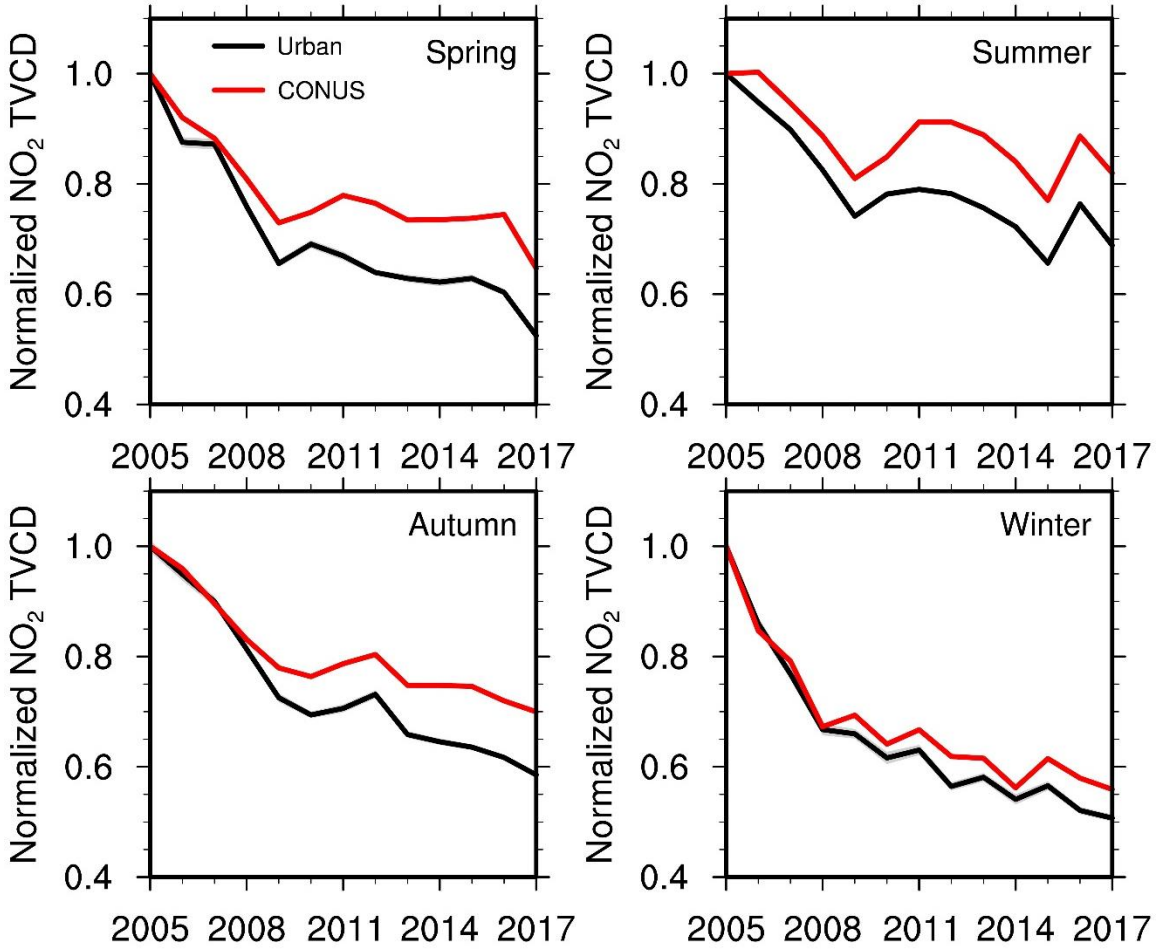

149

150 Figure S96. Relative variations of OMI-QA4ECV NO<sub>2</sub> TVCD data for urban regions (black lines)  
 151 and the whole CONUS (red lines) from 2005 – 2017 in 4 seasons.

152

1

SUPPORTING INFORMATION AVAILABLE

2

**Inferring the anthropogenic NO<sub>x</sub> emission trend  
over the United States during 2003 - 2017 from  
satellite observations: Was there a flattening of  
the emission trend after the Great Recession?**

3

4

5

6

Jianfeng Li<sup>1</sup>, Yuhang Wang<sup>1\*</sup>

7

<sup>1</sup>School of Earth and Atmospheric Sciences, Georgia Institute of Technology, Atlanta, Georgia,  
USA

8

9

\* *Correspondence to* Yuhang Wang (yuhang.wang@eas.gatech.edu)

10

11

## 12 **Table Captions**

13 Table S1. Summary of major satellite instruments for remote sensing of atmospheric NO<sub>2</sub> VCD in  
14 the past decade

15 Table S2. Summary of satellite NO<sub>2</sub> TVCD products and their retrieval information

16 Table S3. Selection criteria for satellite NO<sub>2</sub> TVCD pixel data

17 Table S4. Summary of annual trends of AQS NO<sub>2</sub> surface concentrations and satellite NO<sub>2</sub> TVCD  
18 products in each region during different periods

19 **Table S1. Summary of major satellite instruments for remote sensing of atmospheric NO<sub>2</sub> VCD in the past decade**

| Instrument | Satellite              | Launch date              | End date                | Operator              | Equator crossing time (local time) | UV/Vis Spectral range (nm) | Spectral resolution (nm) | Swath length (km)                                                                                | Nadir pixel resolution (km × km)                                                                        | Global coverage (days) |
|------------|------------------------|--------------------------|-------------------------|-----------------------|------------------------------------|----------------------------|--------------------------|--------------------------------------------------------------------------------------------------|---------------------------------------------------------------------------------------------------------|------------------------|
| SCIAMACHY  | ENVISAT <sup>1</sup>   | 03/01/2002 <sup>2</sup>  | 04/08/2012 <sup>2</sup> | ESA <sup>3</sup>      | 10:00 <sup>1</sup>                 | 240 – 805 <sup>4</sup>     | 0.24 – 0.48 <sup>4</sup> | 960 <sup>5</sup>                                                                                 | 60 × 30 <sup>5</sup>                                                                                    | 6 <sup>5</sup>         |
| GOME-2A    | MetOp-A <sup>6</sup>   | 10/19/2006 <sup>6</sup>  | in operation            | EUMETSAT <sup>7</sup> | 9:30 <sup>8</sup>                  | 240 – 790 <sup>8</sup>     | 0.26 – 0.51 <sup>8</sup> | 1920 before Jul. 15 <sup>th</sup> , 2013;<br>960 after Jul. 15 <sup>th</sup> , 2013 <sup>8</sup> | 80 × 40 before Jul. 15 <sup>th</sup> , 2013;<br>40 × 40 after Jul. 15 <sup>th</sup> , 2013 <sup>8</sup> | 1.5 <sup>9</sup>       |
| GOME-2B    | MetOp-B <sup>6</sup>   | 09/17/2012 <sup>6</sup>  | In operation            | EUMETSAT              | 9:30 <sup>8</sup>                  | 240 – 790 <sup>8</sup>     | 0.26 – 0.51 <sup>8</sup> | 1920 <sup>8</sup>                                                                                | 80 × 40 <sup>8</sup>                                                                                    | 1.5 <sup>9</sup>       |
| OMI        | EOS-Aura <sup>10</sup> | 07/15/2004 <sup>10</sup> | In operation            | NASA                  | 13:45 <sup>10</sup>                | 270 – 500 <sup>11</sup>    | 0.45 – 1.0 <sup>11</sup> | 2600 <sup>11</sup>                                                                               | 24 × 13 <sup>11</sup>                                                                                   | 1 <sup>11</sup>        |

20 <sup>1</sup> Refer to <https://earth.esa.int/web/guest/missions/esa-operational-eo-missions/envisat>  
21 <sup>2</sup> Refer to <https://en.wikipedia.org/wiki/Envisat>  
22 <sup>3</sup> The European Space Agency  
23 <sup>4</sup> Refer to <http://www.iup.uni-bremen.de/sciamachy/instrument/performance/index.html>  
24 <sup>5</sup> Refer to Boersma et al. (2008), Boersma et al. (2009), and (Lee et al., 2009)  
25 <sup>6</sup> Refer to <https://www.eumetsat.int/website/home/Satellites/CurrentSatellites/Metop/index.html>  
26 <sup>7</sup> The European Organization for the Exploitation of Meteorological Satellites  
27 <sup>8</sup> Refer to EUMETSAT (2015)  
28 <sup>9</sup> Refer to Lee et al. (2009) and Wang et al. (2017)  
29 <sup>10</sup> Refer to <https://aura.gsfc.nasa.gov/>  
30 <sup>11</sup> Refer to <https://aura.gsfc.nasa.gov/omi.html>

31 **Table S2. Summary of satellite NO<sub>2</sub> TVCD products and their retrieval information**

| NO <sub>2</sub> TVCD products | Version       | Available period        | DOAS fitting method                                                                     | Stratosphere–troposphere separation                                                                                                                                                | Fitting window (nm)        | Albedo / reflectance                                                           | A priori profiles              | Radiative transfer model | Cloud                                                         | Uncertainty                                                                                                                                                                                                      |
|-------------------------------|---------------|-------------------------|-----------------------------------------------------------------------------------------|------------------------------------------------------------------------------------------------------------------------------------------------------------------------------------|----------------------------|--------------------------------------------------------------------------------|--------------------------------|--------------------------|---------------------------------------------------------------|------------------------------------------------------------------------------------------------------------------------------------------------------------------------------------------------------------------|
| GOME-2B                       | TM4NO2A (2.3) | 12/20/2012 – current    | Intensity fit <sup>1</sup>                                                              | Assimilation of satellite total slant columns in the TM4 model <sup>2, 3</sup>                                                                                                     | 405 – 465 <sup>1</sup>     | Climatology albedo from 3 years of OMI data <sup>4</sup>                       | TM4 (2° × 3°) <sup>2</sup>     | DAK <sup>2</sup>         | FRESCO+ (Oxygen A-band around 760 nm) <sup>5</sup>            | 1.0 × 10 <sup>15</sup> molecules/cm <sup>2</sup> + 25% <sup>2</sup>                                                                                                                                              |
| SCIAMACHY                     | QA4ECV (v1.1) | 08/02/2002 – 04/08/2012 | Optical Density <sup>1, 6</sup>                                                         | Assimilation of OMI total slant columns in the TM5 - MP model <sup>6, 7</sup>                                                                                                      | 425 – 465 <sup>6</sup>     | Climatology albedo based on SCIAMACHY <sup>8</sup>                             | TM5-MP (1° × 1°) <sup>6</sup>  | DAK                      | FRESCO+                                                       | 35% - 45% over polluted scenes; > 100% over background regions (Pacific Ocean) <sup>6</sup>                                                                                                                      |
| GOME-2A                       | QA4ECV (v1.1) | 02/01/2007 – 12/31/2016 |                                                                                         |                                                                                                                                                                                    | 405 – 465 <sup>1, 6</sup>  | Climatology albedo based on GOME-2A <sup>8</sup>                               |                                |                          | FRESCO+                                                       |                                                                                                                                                                                                                  |
| OMI-QA4ECV                    | QA4ECV (v1.1) | 10/01/2004 – Current    |                                                                                         |                                                                                                                                                                                    | 405 – 465 <sup>1, 6</sup>  | Climatology albedo from 5 years of OMI data <sup>6</sup>                       |                                |                          | Improved O <sub>2</sub> -O <sub>2</sub> (477 nm) <sup>9</sup> |                                                                                                                                                                                                                  |
| OMI-NASA                      | SPv3          | 01/01/2005 – 07/31/2017 | Stepwise intensity fit with monthly averaged solar irradiance spectrum <sup>1, 10</sup> | Based on OMI total slant columns over regions with low estimated TVCD contributions (TVCD contributions less than 0.3 × 10 <sup>15</sup> molecules/cm <sup>2</sup> ) <sup>10</sup> | 402 – 465 <sup>1, 10</sup> | OMI climatology albedo <sup>10</sup>                                           | GMI (1° × 1.25°) <sup>10</sup> | TMORAD <sup>10</sup>     | O <sub>2</sub> -O <sub>2</sub> (477 nm) <sup>10, 11</sup>     | SPv2.1 TVCD has uncertainties of about 30% under clear-sky conditions to about 60% under cloudy conditions <sup>12</sup> , and the relative difference between SPv3 and SPv2.1 is less than ~20% <sup>10</sup> . |
| OMI-BEHR <sup>13</sup>        | v3.0B         | 01/01/2005 – 07/31/2017 |                                                                                         |                                                                                                                                                                                    |                            | Based on MCD43D BRDF product (for land) and model parameterization (for ocean) |                                |                          |                                                               |                                                                                                                                                                                                                  |

32 <sup>1</sup> Refer to Zara et al. (2018)

33 <sup>2</sup> Refer to Boersma et al. (2011). “TM4” is the Tracer Model, version 4. “DAK” is the Doubling-Adding KNMI (DAK) radiative transfer model.

34 <sup>3</sup> Refer to Williams et al. (2009)

35 <sup>4</sup> Refer to Kleipool et al. (2008)

36 <sup>5</sup> Refer to Wang et al. (2017) and Wang et al. (2008)

37 <sup>6</sup> Refer to Boersma et al. (2018)

38 <sup>7</sup> Refer to Williams et al. (2017)

39 <sup>8</sup> Refer to Tilstra et al. (2017)

40 <sup>9</sup> Refer to Veeffkind et al. (2016)

41 <sup>10</sup> Refer to Bucsela et al. (2013), Bucsela et al. (2016), Krotkov et al. (2017), and Marchenko et al. (2015). “TMORAD” is the TMOS radiative transfer model.

42 <sup>11</sup> Refer to Acarreta et al. (2004)

43 <sup>12</sup> Refer to Lamsal et al. (2014), Oetjen et al. (2013), and Tong et al. (2015)

44 <sup>13</sup> Refer to Laughner et al. (2018). OMI-BEHR uses the SCD from OMI-NASA SPv3 but updates inputs for the AMF calculation, such as a prior NO<sub>2</sub> vertical profiles and surface reflectance. Besides, OMI-BEHR only provides NO<sub>2</sub> TVCD over the contiguous United States (CONUS). As in this study, we used the OMI-NASA datasets archived in the OMI-BEHR product, so we only obtained OMI-NASA datasets extended to July 31, 2017.

46 <sup>14</sup> Average uncertainty over the CONUS is calculated based on the file from <http://behr.cchem.berkeley.edu/behr/BEHR-us-uncertainty.hdf>

47 **Table S3. Selection criteria for satellite NO<sub>2</sub> TVCD pixel data**

| NO <sub>2</sub> TVCD products | Period                  | Solar zenith angle | albedo | Cloud radiance fraction | Snow or ice covered | AMFtrop/AMFgeo | Flag for retrieval success | Retrieval quality flag | Rows in swath |
|-------------------------------|-------------------------|--------------------|--------|-------------------------|---------------------|----------------|----------------------------|------------------------|---------------|
| GOME-2B                       | 01/01/2013 – 12/31/2017 | < 80°              | <= 0.3 | <= 50%                  | No                  | > 0.2          | Yes                        |                        | All           |
| SCIAMACHY                     | 01/01/2003 – 12/31/2011 | < 80°              | <= 0.3 | <= 50%                  | No                  | > 0.2          | Yes                        |                        | All           |
| GOME-2A                       | 01/01/2008 – 12/31/2016 | < 80°              | <= 0.3 | <= 50%                  | No                  | > 0.2          | Yes                        |                        | All           |
| OMI-QA4ECV <sup>1</sup>       | 01/01/2005 – 12/31/2017 | < 80°              | <= 0.3 | <= 50%                  | No                  | > 0.2          | Yes                        |                        | 6 - 21        |
| OMI-NASA <sup>1</sup>         | 01/01/2005 – 12/31/2016 | < 80°              | <= 0.3 | <= 50%                  |                     |                | Yes                        | Yes                    | 6 – 21        |
| OMI-BEHR <sup>1</sup>         | 01/01/2005 – 12/31/2016 | < 80°              | <= 0.3 | <= 50%                  |                     |                | Yes                        | Yes                    | 6 - 21        |

48 <sup>1</sup> Rows 6-21 are selected to remove the anomalies developed in the OMI sensor (Boersma et al., 2018; Zhang et al., 2018).

**Table S4. Summary of annual trends of AQS NO<sub>2</sub> surface concentrations and satellite NO<sub>2</sub> TVCD products in each region during different periods<sup>1</sup>**

|                                             |             | Northeast     |              | Midwest       |              | South        |             | West          |              |
|---------------------------------------------|-------------|---------------|--------------|---------------|--------------|--------------|-------------|---------------|--------------|
|                                             |             | AQS site      | CONUS        | AQS site      | CONUS        | AQS site     | CONUS       | AQS site      | CONUS        |
| AQS NO <sub>2</sub> VMR<br>at 13:00 -14:00  | 2003 – 2011 | -6.8 ± 0.7%   |              | -6.1 ± 1.2%   |              | -6.6 ± 0.7%  |             | -7.6 ± 1.2%   |              |
|                                             | 2011 – 2017 | -8.0 ± 1.2%   |              | -6.4 ± 0.8%   |              | -5.8 ± 0.6%  |             | -7.2 ± 1.6%   |              |
| AQS NO <sub>2</sub> VMR<br>at 10:00 – 11:00 | 2003 – 2011 | -6.6 ± 0.5%   |              | -5.8 ± 1.5%   |              | -6.5 ± 1.3%  |             | -7.1 ± 1.6%   |              |
|                                             | 2011 – 2017 | -7.6 ± 1.0%   |              | -6.8 ± 0.5%   |              | -5.7 ± 0.1%  |             | -6.1 ± 1.1%   |              |
| SCIAMACHY                                   | 2003 – 2011 | -17.1 ± 2.7%  | -11.0 ± 3.3% | -12.9 ± 6.8%  | -6.5 ± 0.8%  | -9.1 ± 1.0%  | -6.2 ± 1.5% | -9.1 ± 1.8%   | -7.0 ± 1.4%  |
|                                             | 2011 – 2017 |               |              |               |              |              |             |               |              |
| GOME2B                                      | 2003 – 2011 |               |              |               |              |              |             |               |              |
|                                             | 2013 – 2017 | -11.4 ± 3.7%  | -10.8 ± 3.9% | -9.9 ± 13.1%  | -4.4 ± 27.2% | -8.9 ± 3.0%  | -7.5 ± 3.6% | -11.8 ± 3.0%  | -10.6 ± 2.3% |
| OMI-QA4ECV                                  | 2005 – 2011 | -14.2 ± 6.3%  | -10.6 ± 3.8% | -9.2 ± 4.2%   | -8.4 ± 2.8%  | -9.2 ± 2.7%  | -8.2 ± 1.5% | -10.5 ± 1.6%  | -8.7 ± 0.9%  |
|                                             | 2011 – 2017 | -18.0 ± 16.2% | -7.6 ± 4.2%  | -7.6 ± 3.3%   | -7.0 ± 1.7%  | -4.8 ± 1.4%  | -4.6 ± 1.0% | -6.4 ± 1.4%   | -4.8 ± 1.2%  |
| OMI-NASA                                    | 2005 – 2011 | -11.8 ± 1.3%  | -11.0 ± 1.8% | -10.9 ± 4.8%  | -10.0 ± 4.1% | -10.0 ± 3.5% | -9.5 ± 1.9% | -10.2 ± 1.8%  | -8.5 ± 0.9%  |
|                                             | 2011 – 2016 | -10.0 ± 4.9%  | -8.5 ± 3.8%  | -13.2 ± 3.2%  | -9.2 ± 2.7%  | 0.3 ± 19.2%  | -8.0 ± 5.5% | -9.0 ± 5.7%   | -6.6 ± 3.9%  |
| OMI-BEHR                                    | 2005 – 2011 | -11.8 ± 1.8%  | -10.9 ± 1.9% | -12.2 ± 7.3%  | -9.8 ± 4.4%  | -9.5 ± 3.1%  | -8.8 ± 2.0% | -9.9 ± 1.1%   | -8.2 ± 0.4%  |
|                                             | 2011 – 2016 | -8.2 ± 3.4%   | -6.6 ± 1.7%  | -27.4 ± 24.3% | -8.1 ± 3.0%  | -7.2 ± 2.3%  | -5.0 ± 1.3% | -13.2 ± 14.5% | -7.0 ± 4.8%  |

<sup>1</sup> Annual trends are the averages of regional seasonal trends (e.g, Figure 7).



## 52 **References**

- 53 Acarreta, J. R., de Haan, J. F., and Stammes, P.: Cloud pressure retrieval using the O<sub>2</sub>-O<sub>2</sub>  
54 absorption band at 477 nm, *J. Geophys. Res.-Atmos.*, 109, 10.1029/2003JD003915, 2004.
- 55 Boersma, K. F., Jacob, D. J., Eskes, H. J., Pinder, R. W., Wang, J., and Van Der A, R. J.:  
56 Intercomparison of SCIAMACHY and OMI tropospheric NO<sub>2</sub> columns: Observing the diurnal  
57 evolution of chemistry and emissions from space, *J. Geophys. Res.-Atmos.*, 113,  
58 10.1029/2007JD008816, 2008.
- 59 Boersma, K. F., Jacob, D. J., Trainic, M., Rudich, Y., De Smedt, I., Dirksen, R., and Eskes, H. J.:  
60 Validation of urban NO<sub>2</sub> concentrations and their diurnal and seasonal variations observed from  
61 the SCIAMACHY and OMI sensors using in situ surface measurements in Israeli cities, *Atmos.*  
62 *Chem. Phys.*, 9, 3867-3879, 10.5194/acp-9-3867-2009, 2009.
- 63 Boersma, K. F., Eskes, H. J., Dirksen, R. J., Veefkind, J. P., Stammes, P., Huijnen, V., Kleipool,  
64 Q. L., Sneep, M., Claas, J., and Leitão, J.: An improved tropospheric NO<sub>2</sub> column retrieval  
65 algorithm for the Ozone Monitoring Instrument, *Atmos. Meas. Tech.*, 4, 1905-1928,  
66 10.5194/amt-4-1905-2011, 2011.
- 67 Boersma, K. F., Eskes, H. J., Richter, A., De Smedt, I., Lorente, A., Beirle, S., van Geffen, J. H.,  
68 Zara, M., Peters, E., and Roozendaal, M. V.: Improving algorithms and uncertainty estimates for  
69 satellite NO<sub>2</sub> retrievals: results from the quality assurance for the essential climate variables  
70 (QA4ECV) project, *Atmos. Meas. Tech.*, 11, 6651-6678, 10.5194/amt-11-6651-2018, 2018.
- 71 Bucselá, E. J., Krotkov, N. A., Celarier, E. A., Lamsal, L. N., Swartz, W. H., Bhartia, P. K.,  
72 Boersma, K. F., Veefkind, J. P., Gleason, J. F., and Pickering, K. E.: A new stratospheric and  
73 tropospheric NO<sub>2</sub> retrieval algorithm for nadir-viewing satellite instruments: applications to OMI,  
74 *Atmos. Meas. Tech.*, 6, 2607-2626, 10.5194/amt-6-2607-2013, 2013.
- 75 Bucselá, E. J., Celarier, E. A., Gleason, J. L., Krotkov, N. A., Lamsal, L. N., Marchenko, S. V.,  
76 and Swartz, W. H.: OMNO2 README Document Data Product Version 3.0, NASA, 38, 2016.
- 77 EUMETSAT: GOME\_FACTSHEET, Germany, 33, 2015.
- 78 Kleipool, Q. L., Dobber, M. R., de Haan, J. F., and Levelt, P. F.: Earth surface reflectance  
79 climatology from 3 years of OMI data, *J. Geophys. Res.-Atmos.*, 113, 10.1029/2008JD010290,  
80 2008.
- 81 Krotkov, N. A., Lamsal, L. N., Celarier, E. A., Swartz, W. H., Marchenko, S. V., Bucselá, E. J.,  
82 Chan, K. L., Wenig, M., and Zara, M.: The version 3 OMI NO<sub>2</sub> standard product, *Atmos. Meas.*  
83 *Tech.*, 10, 3133-3149, 10.5194/amt-10-3133-2017, 2017.
- 84 Lamsal, L. N., Krotkov, N. A., Celarier, E. A., Swartz, W. H., Pickering, K. E., Bucselá, E. J.,  
85 Gleason, J. F., Martin, R. V., Philip, S., and Irie, H.: Evaluation of OMI operational standard NO<sub>2</sub>  
86 column retrievals using in situ and surface-based NO<sub>2</sub> observations, *Atmos. Chem. Phys.*, 14,  
87 11587-11609, 10.5194/acp-14-11587-2014, 2014.

- 88 Laughner, J. L., Zhu, Q., and Cohen, R. C.: The Berkeley High Resolution Tropospheric NO<sub>2</sub>  
89 product, *Earth System Science Data*, 10, 2069-2095, 10.5194/essd-10-2069-2018, 2018.
- 90 Lee, C., Martin, R. V., van Donkelaar, A., Richter, A., Burrows, J. P., and Kim, Y. J.: Remote  
91 Sensing of Tropospheric Trace Gases (NO<sub>2</sub> and SO<sub>2</sub>) from SCIAMACHY, in: *Atmospheric and*  
92 *Biological Environmental Monitoring*, Springer, 63-72, 2009.
- 93 Marchenko, S., Krotkov, N. A., Lamsal, L. N., Celarier, E. A., Swartz, W. H., and Bucsela, E. J.:  
94 Revising the slant column density retrieval of nitrogen dioxide observed by the Ozone  
95 Monitoring Instrument, *J. Geophys. Res.-Atmos.*, 120, 5670-5692, 10.1002/2014JD022913,  
96 2015.
- 97 Oetjen, H., Baidar, S., Krotkov, N. A., Lamsal, L. N., Lechner, M., and Volkamer, R.: Airborne  
98 MAX-DOAS measurements over California: Testing the NASA OMI tropospheric NO<sub>2</sub> product,  
99 *J. Geophys. Res.-Atmos.*, 118, 7400-7413, 10.1002/jgrd.50550, 2013.
- 100 Tilstra, L. G., Tuinder, O. N. E., Wang, P., and Stammes, P.: Surface reflectivity climatologies  
101 from UV to NIR determined from Earth observations by GOME-2 and SCIAMACHY, *J.*  
102 *Geophys. Res.-Atmos.*, 122, 4084-4111, 10.1002/2016JD025940, 2017.
- 103 Tong, D., Lamsal, L., Pan, L., Ding, C., Kim, H., Lee, P., Chai, T., Pickering, K. E., and Stajner,  
104 I.: Long-term NO<sub>x</sub> trends over large cities in the United States during the great recession:  
105 Comparison of satellite retrievals, ground observations, and emission inventories, *Atmos.*  
106 *Environ.*, 107, 70-84, 10.1016/j.atmosenv.2015.01.035, 2015.
- 107 Veefkind, J. P., de Haan, J. F., Sneep, M., and Levelt, P. F.: Improvements to the OMI O<sub>2</sub>-O<sub>2</sub>  
108 operational cloud algorithm and comparisons with ground-based radar-lidar observations, *Atmos.*  
109 *Meas. Tech.*, 9, 6035-6049, 10.5194/amt-9-6035-2016, 2016.
- 110 Wang, P., Stammes, P., van der A, R., Pinardi, G., and van Roozendael, M.: FRESCO+: an  
111 improved O<sub>2</sub> A-band cloud retrieval algorithm for tropospheric trace gas retrievals, *Atmos.*  
112 *Chem. Phys.*, 8, 6565-6576, 10.5194/acp-8-6565-2008, 2008.
- 113 Wang, Y., Beirle, S., Lampel, J., Koukouli, M., De Smedt, I., Theys, N., Ang, L., Wu, D., Xie, P.,  
114 and Liu, C.: Validation of OMI, GOME-2A and GOME-2B tropospheric NO<sub>2</sub>, SO<sub>2</sub> and HCHO  
115 products using MAX-DOAS observations from 2011 to 2014 in Wuxi, China: investigation of the  
116 effects of priori profiles and aerosols on the satellite products, *Atmos. Chem. Phys.*, 17, 5007,  
117 10.5194/acp-17-5007-2017, 2017.
- 118 Williams, J. E., Scheele, M. P., van Velthoven, P. F. J., Cammas, J.-P., Thouret, V., Galy-Lacaux,  
119 C., and Volz-Thomas, A.: The influence of biogenic emissions from Africa on tropical  
120 tropospheric ozone during 2006: a global modeling study, *Atmos. Chem. Phys.*, 9, 5729-5749,  
121 10.5194/acp-9-5729-2009, 2009.
- 122 Williams, J. E., Boersma, K. F., Sager, P. L., and Verstraeten, W. W.: The high-resolution version  
123 of TM5-MP for optimized satellite retrievals: description and validation, *Geoscientific Model*  
124 *Development*, 10, 721-750, 10.5194/gmd-10-721-2017, 2017.
- 125 Zara, M., Boersma, K. F., De Smedt, I., Richter, A., Peters, E., Van Geffen, J. H. G. M., Beirle,  
126 S., Wagner, T., Van Roozendael, M., and Marchenko, S.: Improved slant column density retrieval

127 of nitrogen dioxide and formaldehyde for OMI and GOME-2A from QA4ECV: intercomparison,  
128 uncertainty characterization, and trends, Meas. Tech. Discuss, 1-47, 10.5194/amt-11-4033-2018,  
129 2018.

130 Zhang, R., Wang, Y., Smeltzer, C., Qu, H., Koshak, W., and Boersma, K. F.: Comparing OMI-  
131 based and EPA AQS in situ NO<sub>2</sub> trends: towards understanding surface NO<sub>x</sub> emission changes,  
132 Atmos. Meas. Tech., 11, 3955-3967, 10.5194/amt-11-3955-2018, 2018.

133
